# Supplementary material for: AeroCom phase III multi-model evaluation of the aerosol life cycle and optical properties using ground- and space-based remote sensing as well as surface in situ observations
Source: Copernicus journal article supplement (doi:10.5194/acp-21-87-2021), 2021-01-06
Supplement: Supplementary file 1 [file acp-21-87-2021-supplement.zip]

Archive with 3 entries (3 files):
- supplement2.pdf
- acp-21-87-2021-supplement-title-page.pdf
- supplement1.ods
