# Supplementary material for: AeroCom phase III multi-model evaluation of the aerosol life cycle and optical properties using ground- and space-based remote sensing as well as surface in situ observations
Source: Copernicus journal article supplement (doi:10.5194/acp-21-87-2021), 2021-01-06
Supplement: Supplementary file 1 [file acp-21-87-2021-supplement.zip › acp-21-87-2021-supplement-title-page.pdf]

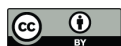

## *Supplement of*

# **AeroCom phase III multi-model evaluation of the aerosol life cycle and optical properties using ground- and space-based remote sensing as well as surface in situ observations**

**Jonas Gliß et al.**

*Correspondence to:* Jonas Gliß ([jonasg@met.no](mailto:jonasg@met.no))

- [acp-21-87-2021-supplement-title-page.pdf](#)
- [supplement1.ods](#)
- [supplement2.pdf](#)

The copyright of individual parts of the supplement might differ from the CC BY 4.0 License.
