# Supplementary material for: AeroCom phase III multi-model evaluation of the aerosol life cycle and optical properties using ground- and space-based remote sensing as well as surface in situ observations
Source: Copernicus journal article supplement (doi:10.5194/acp-21-87-2021), 2021-01-06
Supplement: Supplementary file 1 [file acp-21-87-2021-supplement.zip › supplement1.ods]

## Sheet: Questions
AeroCom CTRL 2019 optics questionnaire
About
Model questionnaire for Gliss et al., 2020, aerosol optical property study (AeroCom Phase III, Control 2019 reference paper)
Supplementary material #1 for acp-2019-1214
Contact: Jonas Gliss (jonasg@met.no), Michael Schulz (michaels@met.no), Norwegian Meteorological Institute
GENERAL QUESTIONS
Please answer in sheet: "Table: General questions"
#	Abbr. (for table)	Question
G1	Mixing	Do you assume internal mixing when computing optical properties of total aerosol? Which mixing assumptions (Maxwell/Garnet, Volume mixing, core shell, external) ?
G2	CSvsAS	Do you report clear-sky or all-sky AOD to AeroCom (or both)?
G2b	CShow	If you diagnose clear-sky or all-sky AOD ⇒ How do you compute it?
G2c	DiffCS	If you diagnose both, what is the difference (global annual mean)?
G3	DayNight	Do you average nighttime and daytime values of AOD into daily averages?
G4	RTcalcRH	Which humidity is used for the AOD used in the radiative transfer calculations?
G5	GrowthFac	Which humidity growth factor and variation do you use? How does it depend on RH? Do you include sub-grid variability in relative humidity?
G5b	HygroMix	How do you determine the hygroscopicity of an internally mixed aerosol (core-shell, volume mixing, other)?
G5c	GrowthHyst	What hygroscopic growth do you assume in the hysteresis region towards low RHs?
G6	FineMode	How to you compute fine mode (od550lt1aer) AOD (i.e. at which particle diameter do you separate? Which bins are used?)
G7	OC2OA	What OA/OC ratio do you assume (or which range)?
G8	Refs	Which references describe the optical property calculations in the submitted model version? Please provide weblink as well.
G9	KinneComp	What are the main changes applied in the model since Kinne et al., 2006?
AEROSOL SPECIES SPECIFIC QUESTIONS
Please answer in sheet: "Table: Species specific"
#	Abbr. (for table)	Question
S1	specRefrIdx	What is the complex refractive index of all species at 550nm (SO4, BC, NO3, DUST, OA, SS, H2O)?
S2	specSize	What is the average size of each aerosol species (effective radius, ...)?
S3	specKappa	How does the humidity growth factor depend on composition (Kappa for each species)?
S4	specRho	What is the density of each species?
S5	specRH	If you report AOD per species (and AAOD): how do you account for mixing and humidity growth?
S6	emi	Which emissions are used for the different species (e.g. CMIP6, dust, seasalt, DMS, biomass burning, VOCs, volcanic, marine primary organic, any other?)
S7	emiVert	What emission altitudes (other than surface) are used for each species?
OA SPECIFIC QUESTIONS
Please see and answer in sheet: "Table: OA details"

## Sheet: Table General questions
GENERAL QUESTIONS	Hover abbreviations in question columns to see each question
				G1	G2	G2b	G2c	G3	G4	G5	G5b	G5c	G6	G7	G8	G9
Model	AeroCom ID	Contact	Email	Mixing	CSvsAS	CShow	DiffCS	DayNight	RTcalcRH	GrowthFac	HygroMix	GrowthHyst	FineMode	OC2OA	Refs	KinneComp
CAM5-ATRAS	CAM5-ATRAS_AP3-CTRL	Hitoshi Matsui	matsui@nagoya-u.jp	Core-shell for internally-mixed BC particles; Volume mixing for pure BC and BC free particles.	CS	Wet diameter is calculated for RH averaged over cloud-free area (maximum RH = 95%).		Yes	RH of the cloud free area.	Water uptake is calculated based on the K-Kohler theory. Sub-grid variability of RH is not considered.	Volume mixing	Hysterisis is not considered. Particles are assumed wet.	AOD for particles with dry radii<0.5um.	1.4 (emissions)	Matsui, H. (2017), Development of a global aerosol model using a two-dimensional sectional method: 1. Model design, J. Adv. Model. Earth Syst., 9, 1921–1947, doi:10.1002/2017MS000936.; Matsui, H., and N. Mahowald (2017), Development of a global aerosol model using a two-dimensional sectional method: 2. Evaluation and sensitivity simulations, J. Adv. Model. Earth Syst., 9, 1887–1920, doi:10.1002/2…	N/A
EC-Earth3-AerChem	EC-Earth3-AerChem-met2010_AP3-CTRL2019	Noije van, Twan	twan.van.noije@knmi.nl	As for TM5.											van Noije et al., Geosci. Model Dev., 7, 2435–2475, https://doi.org/10.5194/gmd-7-2435-2014, 2014; van Noije et al., EC-Earth3-AerChem, a global climate model with interactive aerosols and atmospheric chemistry participating in CMIP6, Geosci. Model Dev., in preparation.	N/A
TM5	TM5-met2010_AP3-CTRL2019	Noije van, Twan	twan.van.noije@knmi.nl	Internal and external mixing. Effective-medium approximations are applied to calculate the refractive indices of the internally mixed modes. Sulfate, organic aerosols, sea salt, ammonium nitrate, MSA, and water are treated as homogeneous mixtures described by the Bruggeman mixing rule. When black carbon and/or dust are present in the mix, these are treated as inclusions in a homogeneous backgroun…	CS	In grid boxes where the all-sky relative humidity (RH) exceeds 90%, the clear-sky RH is calculated by assuming that the all-sky RH is the area weighted average of the cloudy-sky RH, set to 100%, and the clear-sky RH, and applying a minimum value of 75%; where the all-sky RH is lower than or equal to 90%, the clear-sky RH is set equal to the all-sky RH. The clear-sky RH is used to calculate the ae…	N/A	Yes	Clear-sky relative humidity	Aerosol water uptake is calculated using the clear-sky relative humidity. Subgrid variability other than the distinction between cloudy-sky and clear-sky is not taken into account. For pure sulphate-water particles the water uptake is calculated using the parameterization from Zeleznik (1991). See next column for treatment of internal mixtures.	For internal mixtures containing sea salt, the water uptake is calculated using the ZSR method (Zdanovskii, 1948; Stokes and Robinson, 1966); additional water uptake in the presence of ammonium nitrate in the soluble accumulation mode is calculated using EQSAM (Metzger et al., 2002). Black carbon, organic matter and dust do not influence the water uptake.	For clear-sky relative humidities below 45% (the crystallization point for NaCl) particles in the soluble accumulation and coarse modes are assumed to be dry.	AOD for particles with (geometric) wet radii<0.5um.	1.6	van Noije et al., Geosci. Model Dev., 7, 2435–2475, https://doi.org/10.5194/gmd-7-2435-2014, 2014; van Noije et al., EC-Earth3-AerChem, a global climate model with interactive aerosols and atmospheric chemistry participating in CMIP6, Geosci. Model Dev., in preparation.	Modal representation using 8 modes to describe externally mixed components replaced by M7. SOA formation included and new particle formation improved (Bergman et al., 2020). Wet scavenging efficiencies updated. Updated emission inventories with dust and sea salt sources now calculated online. Horizontal and vertical resolution increased.
ECHAM-HAM	ECHAM6.3-HAM2.3-met2010_AP3-CTRL	David Neubauer	david.neubauer@env.ethz.ch	Internal and external mixing using volume weighting of refractive indices.	Both	All-sky AOD is grid-averaged (but with hygroscopic growth from 3D cloud-free RH),and clear-sky AOD is AOD of all gridboxes where the instantaneous cloud fraction is less than 100%.	Clear-sky AOD = 0.92 * All-sky AOD	Yes	RH of the cloud free part of the grid box	Kappa-Köhler theory; volume weighted sum of individual species kappa values; RH of cloud free fraction of gridbox; no sub-grid variability.	Volume mixing	Particles are always assumed wet.	AOD for particles with ambient (wet) radii<0.5um	1.4	Tegen, I., Neubauer, D., Ferrachat, S., Siegenthaler-Le Drian, C., Bey, I., Schutgens, N., Stier, P., Watson-Parris, D., Stanelle, T., Schmidt, H., Rast, S., Kokkola, H., Schultz, M., Schroeder, S., Daskalakis, N., Barthel, S., Heinold, B., and Lohmann, U.: The global aerosol–climate model ECHAM6.3–HAM2.3 – Part 1: Aerosol evaluation, Geosci. Model Dev., 12, 1643–1677, https://doi.org/10.5194/gmd…	Addition of aerosol-cloud interactions (liquid, mixed-phase, ice clouds and detrained condensate of convective clouds); size dependent in-cloud and below cloud wet scavenging; new sea salt (temperature dependent) and dust emission schemes; Köhler theory based cloud droplet activation; aerosol radiative effects for both SW and LW; new water uptake scheme; refractive indices of BC updated and furth…
ECHAM-SALSA	ECHAM6.3-SALSA2.0-met2010_AP3-CTRL	Harri Kokkola	harri.kokkola@fmi.fi	Internal and external mixing using volume weighting of refractive indices.	CS	Particle wet size is calculated for RH of cloud free part of the grid box.	N/A	Yes	RH of the cloud free part of the grid box	ZSR following Jacobson 1999.	ZSR	Particles are always assumed wet.	AOD for particles with dry radii<0.5um.	1.4	Bergman, T., et al., Geosci. Model Dev., 5, 845–868, https://doi.org/10.5194/gmd-5-845-2012, Kokkola, H., et al., Geosci. Model Dev., 11, 3833–3863, https://doi.org/10.5194/gmd-11-3833-2018, 2018.	N/A
ECMWF-IFS-45R1	ECMWF-IFS-CY45R1-CAMS-CTRL-met2010_AP3-CTRL	Zak Kipling	Zak.Kipling@ecmwf.int	External mixing	AS	Lookup tables for optical properties of hygroscopic species have a RH dimension.	N/A	Yes	Grid averaged RH	Lookup tables of radius and density factor for each species over RH from 0 to 100%.	N/A	Hysteresis not included.	AOD for particles with dry radii < 0.5um, approximated as everything but the coarser sea-salt and dust bins. For the dust bins, the dry radius is used, while for SS the wet radius at 80% RH is used to split at 0.5um.	1.8	Rémy et al., Geosci. Model Dev., 12, 4627–4659, https://doi.org/10.5194/gmd-12-4627-2019, 2019.	N/A
ECMWF-IFS-46R1	ECMWF-IFS-CY46R1-CAMS-CTRL-met2010_AP3-CTRL	Zak Kipling	Zak.Kipling@ecmwf.int	External mixing	AS	Lookup tables for optical properties of hygroscopic species have a RH dimension.	N/A	Yes	Grid averaged RH	Lookup tables of radius and density factor for each species over RH from 0 to 100%.	N/A	Hysteresis not included.	AOD for particles with dry radii < 0.5um, approximated as everything but the coarser sea-salt and dust bins. For the dust bins, the dry radius is used, while for SS the wet radius at 80% RH is used to split at 0.5um.	1.8	Rémy et al., Geosci. Model Dev., 12, 4627–4659, https://doi.org/10.5194/gmd-12-4627-2019, 2019.	N/A
EMEP	EMEP_rv4_33_Glob-CTRL	Svetlana Tsyro	svetlanat@met.no	External mixing (bulk aerosol mass)	AS	Lookup table for wet diameter for grid-box average RH.	N/A	Yes	N/A	Parameterised RH growth of effective radius for individual aerosol components (Chin et al., 2002).	N/A	N/A	AOD due to fine particles (ambient diameter appr. <2.5um).	1.25 for fossil fuel emissions, 1.67 for wood burning. Tracks separately C and non-C species, and outputs organics in ug and ugC.	EMEP status report 1/2012, Chapter 10 https://emep.int/publ/reports/2012/status_report_1_2012.pdf (last access: 17.03.2020).	N/A
GEOS	GEOS-i33p2-met2010_AP3-CTRL	Huisheng Bian, Mian Chin	huisheng.bian@nasa.gov	External mixing	AS	All-sky AOD is grid-averaged with hygroscopic growth from 3D RH.	N/A	Yes	Grid averaged RH	HGF derived mainly from the Optical Properties of Aerosols and Clouds (OPAC, Hess et al. 1998) database. Slight variation from OPAC exists for sea salt, for which the particle humidifcation is from Gerber (1985). Dust is assumed to be hydrophobic.	N/A	Particles are always assumed wet.	AOD for particles with dry radii<0.5um.	1.8	Colarco, P., A. da Silva, M. Chin, and T. Diehl (2010), Online simulations of global aerosol distributions in the NASA GEOS‐4 model and comparisons to satellite and ground‐based aerosol optical depth, J. Geophys. Res., 115,D14207, doi:10.1029/2009JD012820. https://agupubs.onlinelibrary.wiley.com/doi/epdf/10.1029/2009JD012820.	Implementation of nitrate and ammonium aerosols (Bian et al., 2017), an improved SOA parameterization (based on Hodzic et al., 2011 and Kim et al., 2015), modification of the absorbing properties of “brown carbon” (Colarco et al., 2017), and incorporation of the stratospheric background aerosol from OCS oxidation (Aquila et al., manuscript in preparation).
GFDL-AM4	GFDL-AM4-met2010_AP3-CTRL	Paul Ginoux	paul.ginoux@noaa.gov	All aerosols externally mixed except for sulfate and black carbon which are internally mixed by volume weighting of refractive indices.	AS	All-sky AOD is considering hygroscopic growth using grid-averaged RH but capped to a maximum value of 97%	N/A	Yes	Grid averaged RH	Hygroscopic growth of sulfate is modeled after that of pure ammonium sulfate (Tang and Munkelwitz 1994), of sea salt as pure sodium chloride (Tang et al. 1997), and of hydrophilic organics as a mixture of acids and insoluble or-ganics (Ming et al. 2005). REF1=Tang, I. N., and H. R. Munkelwitz, 1994: Water activities, densities,and refractive indices of aqueous sulfates and sodium nitrate droplets…	Volume mixing	Hygroscopic aerosols grow linearly with RH between the crystallisation and deliquescence states.	AOD for particles with dry radii<0.5um	1.4	Zhao, M., Golaz, J.‐C., Held, I. M., Guo, H., Balaji, V., Benson, R., et al. ( 2018). The GFDL global atmosphere and land model AM4.0/LM4.0: 2. Model description, sensitivity studies, and tuning strategies. Journal of Advances in Modeling Earth Systems, 10, 735– 769. https://doi.org/10.1002/2017MS001209.	N/A
GISS-OMA	GISS-ModelE2p1p1-OMA_AP3-CTRL	Kostas Tsigaridis	kostas.tsigaridis@columbia.edu	External mixing for everything when it comes to optical properties. For dust (less than 4 micron) coating with sulfate and nitrate can happen, as a result of heterogeneous reactions. This only affects wet removal (lifetime) and not optical properties.	Both	A random maximum cloud overlap is calculated in the column, which is then used to define a totally cloudy or totally cloud-free state in radiation, using a pseudo-random number generation. This is described in Hansen et al. (1983).	The difference is that for CS the ambient relative humidity is used, while for AS we use 100%. This creates a large difference between CS and AS.	Yes	Ambient when radiation assumes a CS column, and 100% when radiation assumes a cloudy column. We do not handle partial cloudiness in radiation.	Tang and Munkelwitz (1994; doi:10.1029/94JD01345) parameterization. No subgrid scale parameterization is needed, since our column can only be either 100% cloudy or 100% cloud-free.	N/A	I doubt we include hysterisis.	Sulfate, nitrate, ammonium, OA, BC, are 100% PM1 (radii<0.5um). For dust and seasalt we use a sectional approach, and the bins below D=1um (dry diameter).	1.4 (at emission time)	doi:10.1029/1999JD900248; doi:10.1029/2001JD900038	Sea salt as in Tsigaridis et al. (2013); SOA as in Tsigaridis and Kanakidou (2007) and other Tsigaridis references therein; aerosols coupled to gas-phase and heterogeneous chemistry (Shindell et al. 2013 and references therein); several other minor and major updates, some outlined in Bauer et al. (2020), others in Kelley et al. 2020, and references therein.
INCA	INCA_AP3-CTRL	Ramiro Checa-Garcia	rcheca@lsce.ipsl.fr	All aerosols are externally mixed except BC which in CTRL-2019 is internally mixing with Maxwell-Garnett to compute its refractive index.	CS	We use the clear-sky water to calculate AOD, so our od550aer is actually od550aercs	Not computed, we reported the od550aer with clear-sky humidity.	Yes	Clear Sky RH	The hygroscopic growth of the aerosols particles is taken in account by: (A) Differentiate soluble and insoluble modes; (B) Details are in the reference E. Swietlicki et al, 1999 (Atmospheric Research).	We only use internal mixed aerosol for BC. BC in the soluble accumulation mode was treated as an internal mixture considering insoluble BC inclusions in a soluble hygroscopic aerosol matrix. The full details are at: R. Wang et al, 2015, O. Boucher et al, 2015.	Described at E. Swietlicki et al, 1999 (Atmospheric Research).	The modal approach includes accumulation but not nucleation mode. Accumulation modes are divided in soluble and insoluble with species Dust (insoluble), Sea Salt (soluble), NH3 (both), SO4 (both), NH4 (both), OA (both) and BC (both).	1.4	Black Carbon: treated as an internal mixture with sulfate with enhanced absorption following the relationship found in the erratum to the JGR paper by Rong Wang et al., 2017: Wang, R., et al. (2016), J. Geophys. Res. Atmos., 121, 5948– 5971 doi:10.1002/2015JD024326; SO4: Toon, O. B., Pollack, J. B., and Khare, B. N. (1976) J. Geophys. Res., 81(33) 5733– 5748, doi:10.1029/JC081i033p05733; Sea Salt…	Improvement on Sea-Salt: new lookup table of optical properties based on Mie-Scattering. New scheme of BC implied increase absorption by 50% (internally mixed with the method of Garnett-Maxwell refractive index). The wet scavening has been extended to give more accurate results. Model resolution has been increased and number of vertical levels (from 19 to 79). Updated NO3 and NH4 aerosols modes. …
NorESM2	NorESM2-met2010_AP3-CTRL	Alf Kirkevag, Dirk Olivie	alfk@met.no; dirkjlo@met.no	Internal and external mixing. Maxwell-Garnett is used for calculation of refractive index of internal mixing of BC with other components, otherwise volume mixing.	Both	All-sky optics is grid-averaged (but with hygroscopic growth from 3D cloud-free RH),and clear-sky optics is 2D cloud-free weighted all-sky optics.	Clear-sky AOD = 0.93 * All-sky AOD	Yes	Clear-sky RH (assuming RH=100% in the cloudy part)	Based on Kohler theory, using volume mixed hygroscoicity for internal mixtures. No sub-grid variability, except for using cloud-free fraction for calculation of optics to be compared with satellite and AERONET.	Volume mixing	We simply assume that kappa is reduced by 50%.	AOD for particles with radii<0.5um for each species. These are all-sky values, i.e. not cloud-free weighted.	Assumed in the model: 1.4 for fossil fuel, 2.6 for biomass. Implicitely (for comparison with obs), 8.0 for MSA, 1.14 for monoterpene and isoprene.	Olivie et al. (in prep), with updates from the model version in Kirkevåg et al., 2018, https://doi.org/10.5194/gmd-11-3945-2018.	Prognostic instead of prescribed natural background aerosols (sea-salt, mineral dust, marine biogenic OM (now ncluding MSA). Explicit co-nucleation of sulfate and SOA, and SOA from condensation. Updated mass density (BC), water uptake (almost all components) and refractive indices (BC, mineral dust). Updated sizes for several mixtures/modes at the point of emission, and merging of some mixtures. …
OsloCTM3	OsloCTM3v1.01-met2010_AP3-CTRL	Gunnar Myhre	gunnar.myhre@cicero.oslo.no	BC internal mixing with no-scattering species following Zanatta et al., Atmos. Environ., 145, 346–364, 2016. Internal mixing of BC and OA from biomass burning. External mixiture for rest of the aerosol species.	AS	All-sky optics is made for grid-averaged RH. This approach is made since no-subgrid scale parametrization of RH is availble. Based on published results on high resolution simulation of RH and sensitivity simulations of CS RH, the former effect is likely to be larger. Therefore, we provide AS results.	N/A	Yes	Grid averaged RH	Based on Fitzgerald (1975) for most species and Peng et al. (2001) for OA, see further description in Myhre et al (2007). No sub-grid variability.	Maggi and Hobbs (2003) for biomass burning. No hygroscopic growth for calculations of optical properties of BC.	Hygroscopic aerosols grow linearly with RH between the crystallisation and deliquescence states.	AOD for particles with dry radii<0.5um for each species. These are all-sky values.	1.8 for SOA; For fossil fuel and biofuel emission ratio specied from Eclipse data and in the range 1.6-1.8; 2.6 for biomass burning.	Myhre et al. (2007, https://onlinelibrary.wiley.com/doi/abs/10.1111/j.1600-0889.2006.00226.x) with some updates in Myhre et al. (2009, https://www.atmos-chem-phys.net/9/1365/2009/). Lund et al. 2018, (https://gmd.copernicus.org/articles/11/4909/2018/)	Nitrate aerosols included. Updated optical properties of organic carbon, black carbon and mineral dust have led to stronger absorption. General model changes/improvements in OsloCTM3 compared to OsloCTM2 used in Kinne et al. includes a more efficient transport scheme and an improved wet scavenging scheme for large-scale precipitaiton (that includes liquid and ice water and partially overlapping c…
SPRINTARS	MIROC-SPRINTARS_AP3-CTRL	Toshihiko Takemura	toshi@riam.kyushu-u.ac.jp	50% of BC from fuel sources is treated as internal mixture with OC. The other aerosols are treated as external mixture. The volume weighting of refractive indices is assumed for the intenal mixture.	Both	All-sky AOD is grid-averaged with hygrocsopic growth from 3D RH. Clear-sky AOD is grid-averaged with 2D cloud fraction less than 0.2, otherwise the missing value.	N/A	Yes	Grid-averaged	See Takemura et al. (2002, JCLI 333-352) for sulfate and OC and Table 2 in Shettle and Fenn (1979) for sea salt. Grid-averaged RH is used.	Volume mixing	The dry particle is assumed with RH less than 50%.	AOD for particles with dry radii<0.5um.	1.6 for fuel; 2.6 for biomass burning.	Takemura et al., 2005, https://doi.org/10.1029/2004JD005029.	N/A

## Sheet: Table Species specific
	AEROSOL SPECIES SPECIFIC QUESTIONS (PLEASE SCROLL DOWN TO SEE ALL QUESTIONS)
	S1: What is the complex refractive index of all species at 550nm (SO4, BC, NO3, DUST, OA, SS, H2O)?
	m = n + ik
Model	SS	DUST	SO4	OA	BC	NO3	H2O	Others
CAM5-ATRAS	1.500 + 1.184E-8 i	1.513 + 2.074E-3 i	1.430 + 1E-8 i	1.530 + 5.665E-3 i	1.950 + 0.790 i	1.430 + 1E-8 i	1.334 + 1.638E-9 i	1.430 + 1E-8 i (NH4)
EC-Earth3-AerChem	As for TM5
ECHAM-HAM	1.450 + 1.0E-8 i	1.450 + 1.0E-3 i	1.432 + 1.0E-9 i	1.530 + 5.5E-3 i	1.850 + 0.71 i	N/A	1.335 + 2.8E-9 i
ECHAM-SALSA	1.49+1.0E-8 i	1.53 + 1.1E-3 i	1.43 + 1.0E-8 i	1.53 + 5.5E-3 i	1.85 + 0.71 i	N/A	1.33 + 2.0E-7 i
ECMWF-IFS-45R1	1.51+1E-8 i	1.53 +5.2E-3 i	1.527 +1e-7 i	1.5346 + 0.015 i	1.75 +0.45 i
ECMWF-IFS-46R1	1.51+1E-8 i	1.53 +5.2E-3 i	1.527 +1e-7 i	1.5346 + 0.015 i	1.75 +0.45 i	1.611 (fine); 1.51 + 0.001i (coarse)		1.527 +1e-7 i (NH4)
GEOS	1.50 + 1.55E-8 i	1.53 + 7.8E-3 i	1.43 + 1.0E-8 i	1.53 + 5.0E-3 i	1.75 + 0.45 i	1.43 + 1.0E-8 i
GFDL-AM4	1.4945 + 1.0E-8 i	1.49 + 2.03E-3 i	1.5298 + 1.E-7 i	1.53 + 6E-3 i	1.75 + 0.44 i	N/A	1.333 + 1.96E-9 i
NorESM2	1.5 + 1.0E-8 i	1.53 + 2.4E-3 i	1.43 + 1.0E-8 i	1.53 + 6E-3 i	1.59 + 0.79 i	N/A	1.333 + 1.96E-9 i
OsloCTM3	1.5 + 1.0E-8 i	1.55 + 3.1E-3 i	1.53 + 1.0E-7 i	1.53 + 0.033 i **	1.75 + 0.44 i	1.53 + 1.0E-7 i	1.333 + 1.96E-9 i	1.54 + 0.018 i for biomass burning aerosols	** For absorbing OA and 1.53 + 1.0E-7 i for scattering OA.
SPRINTARS	1.381 + 4.26E-9 i	1.53 + 2E-3 i	1.430 + 1.00E-8 i	1.530 + 6.00E-3 i	1.75 + 0.44 i	1.430 - 1.00E-8 i	1.333 + 1.96E-9 i
TM5	1.500 + 1.00E-8 i	1.517 + 1.09E-3 i	1.430 + 1.00E-8 i	1.530 + 5.54E-3 i	1.850 + 0.71 i	Refractive index of ammonium-nitrate assumed the same as for sulphate; NH4NO3 and H2SO4 added by volume.	1.336 + 2.46E-9 i	Refractive index of MSA assumed the same as for sulphate; MSA and H2SO4 added by volume.
INCA	1.500 + 1.00E-8 i	1.52 + 1.47E-3 i	1.430 + 1.00E-8 i	1.53 + 5.5E-3 i	1.75 + 0.44 i	1.43 + 1E-8 i	1.333 + 1.96e-9 i
GISS-OMA	1.45 + 0 i	1.564 + 2E-3 i	1.528 + 1.E-7 i	1.527 + 0.014 i	1.85 + 0.71 i	1.528 + 1E-7 i	1.334 + 3.91E-8 i
EMEP	MECs based on extinction efficiencies from Chin et al., 2002 and Hess et al., 1998
	S2: What is the effective radius of each aerosol species? (Mass weighted global average)
	r_eff [um]
Model	SS	DUST	SO4	OA	BC	NO3	H2O	Total (dry)	Total (Wet)
CAM5-ATRAS	N/A
EC-Earth3-AerChem	N/A
ECHAM-HAM	N/A
ECHAM-SALSA	N/A
ECMWF-IFS-45R1	bin1: 0.15, bin2: 1.5, bin3: 5	0.27, bin2: 0.41, bin3: 10	0.035	0.024	0.0118	0.0355 (fine); 1 (coarse)
ECMWF-IFS-46R1	N/A	N/A	N/A	0.024	N/A	N/A	N/A	N/A	N/A
GEOS	bin1: 0.079, bin2: 0.316, bin3: 1.119, bin4: 2.818, and bin5: 7.772	bin1: 0.73, bin2: 1.4, bin3: 2.4 bin4: 4.5 and bin5: 8.0	0.119	0.087	0.039	0.2695 for bin1, 2.1 for bin2, and 7.57 for bin3	N/A	N/A	N/A
GFDL-AM4	bin1:0.26, bin2:1.19, bin3:2.43, bin4:3.74, bin5:7.57	bin1:0.26, bin2:1.4, bin3:2.4, bin4:4.5, bin5:7.74	0.17	0.13	0.039	N/A	N/A	N/A	N/A
NorESM2	N/A	N/A	N/A	N/A	N/A	N/A	N/A	0.36, calculated as 3*(Sum of Aerosol Volume per column)/(Sum of Aerosol Surface Area per column)	N/A
OsloCTM3	N/A
SPRINTARS	bin1: 0.178 bin2: 0.562 bin3: 1.78 bin4: 5.62	bin1: 0.13 bin2: 0.33 bin3: 0.82 bin4: 1.27 bin5: 3.20 bin6: 8.02	0.1198	0.1816	0.04	0.1198	N/A	N/A	N/A
TM5	N/A
INCA	N/A
GISS-OMA	0.132, 0.23, 0.416, 0.766, 1.386, 2.773, 5.545	1	0.15	0.2	0.08	0.3
EMEP	fine: 0.8, coarse: 5.73	fine: 0.8, coarse: 4.5	0.16	0.087	0.04	0.16	N/A
	S3: How does the humidity growth factor depend on composition (Kappa for each species)?
	κ appa value
Model	SS	DUST	SO4	OA	BC	NO3	H2O	Others
CAM5-ATRAS	1.16	0.001	0.61	0.1	1.00E-06	0.61	N/A	0.67 for NH4
EC-Earth3-AerChem	Aerosol water uptake calculated with the ZSR method (Zdanovskii, 1948;Stokes and Robinson, 1966) with molalities calculated using parameters from Jacobson et al. (1996); kappa=1.0 for NaCl and 0.95 for Na2SO4 in CDNC calculation	Aerosol water uptake not influenced by dust; kappa=0 in CDNC calculation	Aerosol water uptake calculated using parameterization from Zeleznik (1991); kappa=0.6 for H2SO4 and 0.95 for Na2SO4 in CDNC calculation	Aerosol water uptake not influenced by OA; kappa=0.1 in CDNC calculation	Aerosol water uptake not influenced by BC; kappa=0 in CDNC calculation	Aerosol water uptake calculated from EQSAM (Metzger et al., 2002); kappa=0.6 for NH4NO3 in CDNC calculation	N/A	pKappa=0.6 for MSA in CDNC calculation.
ECHAM-HAM	1.12 for aerosol water uptake; about 1.3 in CDNC calculation	0	0.6 for aerosol water uptake; about 0.7 in CDNC calculation	0.06 for aerosol water uptake; 0 in CDNC calculation	0	N/A	N/A
ECHAM-SALSA	1.27	0	0.57	0.21	0	N/A	N/A
ECMWF-IFS-45R1	external mixing with RH-based lookup table for hygroscopic growth for each species
ECMWF-IFS-46R1	external mixing with RH-based lookup table for hygroscopic growth for each species
GEOS	following equalibrium parameterization of Gerber [1985]	treat as dry particles	As for SS	hydrophilic OC: following equalibrium parameterization of Gerber [1985], hydrophobic OC: treated as dry particles	As for OC	As for SS	N/A
GFDL-AM4	NaCl: Tang et al. (1997)	treat as dry particles	(NH4)2SO4: Haywood and Ramaswamy (1998)	hydrophilic OC: Ming et al. (2005), hydrophobic OC treated as dry	treat as dry	N/A	N/A
NorESM2	1.2	0.069	0.507 / 0.534 for Ammonium sulfate / Sulfuric acid	0.14	5.00E-07	N/A	N/A
OsloCTM3	RH growth factors for the different species: values depending on the RH values from 0 to 99.5. See Burgos et al. (2020) 'A global model-measurement evaluation of particle light scattering coefficients at elevated relative humidity'
SPRINTARS	Shettle and Fenn (1979)		Takemura et al. (2002, JCLI 333-352)	Takemura et al. (2002, JCLI 333-352)		Same as SO4
TM5	Aerosol water uptake calculated with the ZSR method (Zdanovskii, 1948;Stokes and Robinson, 1966) with molalities calculated using parameters from Jacobson et al. (1996); kappa=1.0 for NaCl and 0.95 for Na2SO4 in diagnostic CCN calculation	Aerosol water uptake not influenced by dust; kappa=0 in diagnostic CCN calculation	Aerosol water uptake calculated using parameterization from Zeleznik (1991); kappa=0.6 for H2SO4 and 0.95 for Na2SO4 in diagnostic CCN calculation	Aerosol water uptake not influenced by OA; kappa=0.1 in diagnostic CCN calculation	Aerosol water uptake not influenced by BC; kappa=0 in diagnostic CCN calculation	Aerosol water uptake calculated from EQSAM (Metzger et al., 2002); kappa=0.6 for NH4NO3 in diagnostic CCN calculation	N/A	Kappa=0.6 for MSA in diagnostic CCN calculation.
INCA	RH growth factors for the different species: values depending on the RH values from 0 to 95.
GISS-OMA								Tang and Munkelwitz (1994; doi:10.1029/94JD01345) parameterization.
EMEP	Tabulated GFs
	S4: What is the density of each species?
	ρ [g cm-3]
Model	SS	DUST	SO4	OA	BC	NO3	H2O
CAM5-ATRAS	2.2	2.6	1.8	1.8	1.8	1.8	1	1.8 for NH4
EC-Earth3-AerChem	As for TM5
ECHAM-HAM	2.165	2.65	1.841	2	2	N/A	1
ECHAM-SALSA	2.165	2.65	1.83	2	2	N/A	1
ECMWF-IFS-45R1	2.16	2.6	1.73	1.8	1
ECMWF-IFS-46R1	2.16	2.6	1.73		1	1.73 (fine) and 1.4 (coarse)		1.76 (NH4)
GEOS	2.2	2.5 for bin 1, 2.65 for rest bins	1.7	1.8	1	1.725 for bin1, 2.2 for bin2, and 2.65 for bin3	1
GFDL-AM4	2.16	bin 1: 2.5, other bins: 2.65	1.769	1.8	1	N/A	N/A
NorESM2	2.2	2.6	1.769 / 1.841 for Ammonium sulfate / Sulfuric acid	1.5	1.8	N/A	1
OsloCTM3	2.2	2.6	1.769	1.3	1	1.725	1	1.35 for biomass burning aerosols
SPRINTARS	2.2	2.6	1.769	1.8	2.3	Same as SO4	1
TM5	2.165 (NaCl)	2.650	1.841 for H2SO4, 2.680 for Na2SO4, and 2.435 for NaHSO4	1.300	1.800	1.730 for NH4NO3	1.000	1.480 for MSA
INCA	2.2	2.65	1.725	1.725	1.55	1.725
GISS-OMA	2.165	2.5 for silt (first 4 bins), 2.65 for clay (remaining bins)	1.76	1.5	1.3	1.725
EMEP	2.2	2.6	1.6	1.8	1	1.6
	S5: If you report AOD per species (and AAOD): how do you account for mixing and humidity growth?
Model	SS	DUST	SO4	OA	BC	NO3	H2O
CAM5-ATRAS	AOD (all species are considered) - AOD (the target species is excluded). Water uptake is calculated separately for the two AODs (AOD per species contains the contribution of water uptake).	As for SS	As for SS	As for SS	As for SS	As for SS	AOD (all species with H2O) - AOD (all species without H2O)
EC-Earth3-AerChem	As for TM5
ECHAM-HAM	Volume mixing assumption for each mode when internally mixed (so that the sum of all speciated AODs equals the total). Swelling also uses a volume mixed kappa value.	As for SS	As for SS	As for SS	As for SS	N/A	As for SS
ECHAM-SALSA	Volume mixing + ZSR growth	Volume mixing + ZSR growth	Volume mixing + ZSR growth	Volume mixing + ZSR growth	Volume mixing + ZSR growth	N/A	Volume mixing + ZSR growth
ECMWF-IFS-45R1	external mixing with RH-based lookup table for hygroscopic growth for each species
ECMWF-IFS-46R1	external mixing with RH-based lookup table for hygroscopic growth for each species
GEOS	external mixing, hygroscopic growth rate following equilibrium parameterization of Gerber [1985]	As for SS	As for SS	As for SS	As for SS	As for SS	As for SS
GFDL-AM4	external mixing with RH-based look-up table for hygroscopic growth capped at RH=97%	external mixing, no swelling	internal mixing with BC (Donner et al., 2011) with swelling up to RH=97%; look-up table as a function of mass fraction of BC and RH	As for SS	As for SO4	N/A	N/A
NorESM2	Volume mixing assumption for each size bin when internally mixed (so that the sum of all speciated AODs equals the total). Swelling also uses a volume mixed kappa value.	As for SS	As for SS	As for SS	As for SS	N/A	Total AOD at ambient RH minus totall AOD at RH=0%
OsloCTM3	External mixing and water included	External mixing	External mixing and water included	External mixing and water included	All coating included in AOD & AAOD	External mixing and water included	Included in hygroscopic compounds
SPRINTARS	The sum of AOD of each species equals the total.
TM5	The aerosol water contribution to AOD is calculated as the difference between the ambient and dry AOD. Following an earlier recommendation for AeroCom, the contributions from the other components are calculated by weighting the total ambient aerosol extinction by the volume fraction of that component relative to the total dry volume. This implies that the aerosol water contribution is associated …
INCA	It was explained above.
GISS-OMA	All species are reported separately, as external mixtures after humidification (as needed).
EMEP	The sum of AOD of each species equals the total.
	S6: Which emissions are used for the different species (e.g. CMIP6, dust, seasalt, DMS, biomass burning, VOCs, volcanic, marine primary organic, any other?)
Model	SS	DUST	SOx	OA	BC	NO3	H2O	DMS	NMVOCs	NH3	NOx	CO	CH4
CAM5-ATRAS	Online: Martensson et al. [2003], Monahan et al. [1986]	Online: Zender et al. [2003], Kok [2011]	Anthropogenic & Biomass burning: CMIP6 Volcanoes: Continuous volcanic out-gassing emissions from GEIA (Andres and Kasgnoc, 1998)	CMIP6	CMIP6	N/A	N/A	Prescribed: Kloster et al. 2006 [doi:10.5194/bg-3-29-2006]
EC-Earth3-AerChem	As for TM5.
ECHAM-HAM	Online calcuated based on Guelle et al. (2001)	Online calculated based on Tegen et al. (2002) with modifications described in Cheng et al. (2008) and Heinold et al. (2016)	Volcanic emissions: Carn 2017 (AeroCom Phase III; explosive and degassing emissions for the year 2010); Anthrop. & biomass: CMIP6	SOA is 15% of prescribed natural terpene emissions at the surface (Dentener et al., 2006). SOA are assumed to condense immediately on existing aerosol particles and to have identical properties to primary organic aerosols; Anthrop. & biomass: CMIP6	Anthrop. & biomass: CMIP6	N/A	N/A	Online calculated using sea water concentrations from Lana et al. (2011); parameterisation with air sea exchange from Nightingale et al. (2000)	N/A	N/A	N/A	N/A	N/A
ECHAM-SALSA	Guelle et al., 2007	Heinold, B., et al., Geosci. Model Dev., 9, 765–777, https://doi.org/10.5194/gmd-9-765-2016, 2016	Same as ECHAM-HAM	CMIP6	CMIP6	N/A	N/A	Same as ECHAM-HAM
ECMWF-IFS-45R1	Online, Rémy et al. (2019)	Online, Morcrette et al. (2009), Rémy et al. (2019)	CMIP6; No volcanic SO2 emissions included	CMIP6 + anthropogenic SOA based on CMIP6 CO emissions	CMIP6			DMS emissions are from TM5-offline 2006 model simulation. For this offline simulation, land based emissions for DMS are applied according to Spiro et al. (1992). The ocean-air fluxes are calculated following the parameterization from Liss and Merlivat (1986), depending on wind speed, air temperature, and a climatological DMS concentration field in surface water.	N/A	CMIP6	CMIP6	CMIP6	CMIP6
ECMWF-IFS-46R1	Online, Rémy et al. (2019)	Online, Nabat et al. (2012)	CMIP6; No volcanic SO2 emissions included	CMIP6 + anthropogenic SOA based on CMIP6 CO emissions	CMIP6	N/A	N/A	DMS emissions are from TM5-offline 2006 model simulation. For this offline simulation, land based emissions for DMS are applied according to Spiro et al. (1992). The ocean-air fluxes are calculated following the parameterization from Liss and Merlivat (1986), depending on wind speed, air temperature, and a climatological DMS concentration field in surface water.	N/A	CMIP6	CMIP6	CMIP6	CMIP6
GEOS	N/A	Online calculated using Ginoux et al., (2001)	Volcanic emissions: Carn 2019, FF, BB, ship, and aircraft: CMIP6, DMS: Lana 2011	Monthly VOCs calculated from MEGAN (Guanther et al., 2012) and converted to SOA following Kim et al., (2015), FF, BB, ship, and aircrafte: CMIP6	FF, BB, ship, and aircraft: CMIP6	N/A	N/A	Lana 2011	N/A	FF and BB: CMIP6	N/A	FF and BB: CMIP6, biogenic emissions: MEGAN (Guanther et al, 2012)	N/A
GFDL-AM4	Online: Martensson et al. (2003) for r<1.4 um, Monahan et al. (1986) for r>1.4um; scaling factor=1.33	Online: Ginoux et al., 2001 with Ut=3.5 m/s, Ch=0.2 ug.s2/m5	SO2: cont & expl volc (Dentener et al., 2006) scaling factor=0.25; CMIP6; direct SO4=1% SO2; DMS: Chin et al. (2002)	CMIP6; biogenic terrestrial POA (Dentener et al., 2006); biogenic oceanic POA (O'Dowd et al., 2008); anthro SOA (Tie et al., 2005)	CMIP6	N/A	N/A	online DMS emission (Chin et al., 2002)	N/A	N/A	N/A	N/A	N/A
NorESM2	Salter et al. (2015)	Online calculated in the land-model, based on Zender et al. (2003)	Anthrop. & biomass: CMIP6, effusive volcanic: Dentener et al. (2006).	Natural emissions of POM and VOC for SOA as in Kirkevåg et al (2018). Anthrop. & biomass: CMIP6.	Anthrop. & biomass: CMIP6.	N/A	N/A	Online (Tjiputra et al., 2020)
OsloCTM3	Online, Witek et al. JGR 2016	Online, DEAD v1.3, Zender et al. 2003	CMIP6/CEDS anthropogenic and biomass burning, volcanic included	POA: anthropogenic and biomass burning from CMIP6/CEDS, marine POA following Gantt et al. 2015. SOA: online from MEGAN-MACC biogenic VOCs (Sindelarova et al., 2014) and CMIP6/CEDS anthropogenic precursor emissions	CMIP6/CEDS anthropogenic and biomass burning	N/A	N/A	Prescribed: DMS concentrations from the Kettle and Andreae (2000)	CMIP6/CEDS anthropogenic and biomass burning, MEGAN-MACC biogenic VOCs, oceanic emissions from RETRO	CMIP6/CEDS anthropogenic and biomass burning, GEIA 1997 natural emissions	CMIP6/CEDS anthropogenic and biomass burning, soil NOx RETRO emission inventory	CMIP6/CEDS anthropogenic and biomass burning, ocean CO from RETRO inventory, MEGAN-MACC biogenic CO	N/A
SPRINTARS	See Takemura et al. (2009, ACP 3061-3073)		CMIP6; effusive volcanic emissions from Andres and Kasgnoc (1998)	CMIP6	CMIP6	N/A	N/A	See Takemura et al. (2000, JGR 17853-17873) from oceanic phytoplankton; according to Spiro et al. (1992, JGR 6023-6036).	GEIA database for isporene and terpene.
TM5	Online calculated based on Gong (2003) and Salter et al. (2015).	Online calculated based on Tegen et al. (2002).	Anthropogenic and biomass burning emissions of SOx from CMIP6; effusive volcanic emissions of SOx from Andres and Kasgnoc (1998).	Anthropogenic and biomass burning emissions from CMIP6; biogenic emissions from MEGANv2.1 (Sindelarova et al., 2014) for the year 2000. Marine organic emissions are not included.	Anthropogenic and biomass burning emissions from CMIP6; biogenic emissions from MEGANv2.1 (Sindelarova et al., 2014) for the year 2000.	N/A	N/A	Oceanic DMS emissions calculated online based on Lana et al. (2011) and Wanninkhof et al. (2014). Terres- trial DMS emissions from soils and vegetation are prescribed following Spiro et al. (1992).	Anthropogenic and biomass burning emissions of NMVOCs from CMIP6; biogenic emissions of NMVOCs from vegetation based on MEGANv2.1 (Sindelarova et al., 2014) for the year 2000; oceanic emissions of NMVOCs from Olivier et al. (2003).	Anthropogenic and biomass burning emissions of NH3 from CMIP6; biogenic emissions of NH3 from soils under natural vegetation and oceanic emissions of NH3 from Bouwman et al. (1997).	Anthropogenic and biomass burning emissions of NOx from CMIP6; NOx production by lightning as in Huijnen et al. (2010); biogenic emissions of NOx from soils based on Yienger and Levy (1995).	Anthropogenic and biomass burning emissions of CO from CMIP6; biogenic emissions of CO from vegetation based on MEGANv2.1 (Sindelarova et al., 2014) for the year 2000; oceanic emissions of CO from Olivier et al. (2003).	Anthropogenic and biomass burning emissions of CH4 from CMIP6; natural emissions of CH4 from LPJ for the year 2000 (peatlands, wetlands and wet soils) and HYMN (termites, wild animals and oceanic). These emissions are combined with a nudging scheme to relax the zonal mean mixing ratios of CH4 at the surface and in the stratosphere to observed values.
INCA	Online: Guelle et al, 2011	Online: Schulz et al,1998	CMIP6	CMIP6	CMIP6	N/A	N/A	Surface concentrations prescribed	Prescribed	CMIP6 surface flux prescribed with two components: antropogenic and natural	CMIP6 surface flux prescribed with two components: antropogenic and natural	N/A	N/A
GISS-OMA	online, Gong (2003)	Online, Miller et al. (2006)	CMIP6	CMIP6	CMIP6	N/A	N/A	Online: Kettle and Andreae (2000) and Nightingale et al.(2000)	Online for isoprene (Guenther et al., 1995), Lathiere et al. (2005) for terpenes, CMIP6 for everything else	CMIP6	Online lightning, GEIA for soil, CMIP6 for everything else	CMIP6	Prescribed surface concentrations at surface
EMEP	Online: Monahan etal.1986, Maartensson etal.2003, Callaghan etal.2008	Online: Marticorena and Bergametti (1995), Zender etal, 2003; Alfaro&Gomes, 2001; Fekan etal. 1999 etc.	Anthropogenic ECLIPSE6b, volcano degassing from Etna, Stromboli (as reported to EMEP), Eyjafjallajökull eruption (Melissa Pfeffer, personal communication)	Primary anthropogenic ECLIPSE6b, ASOA and BSOA (VBS scheme); FINN forest fires	ECLIPSE6b, FINN forest fires	N/A	N/A	Online: Liss& Merlivat, 1986, Saltzman etal. 1993; Kettle etal. 1999	Anthropogenic ECLIPSE6b; biogenic Simpson etal. 2012, Simpson etal. 1995	Anthropogenic ECLIPSE6b; crude parameterisation of compoensation point - no NH3 dry deposition over grouing crops	Anthropogenic ECLIPSE6b; aircraft (EU FP6 QUANTIFY), lightning (monthly Kohler et al.,1995), soil (monthly Zaehle et al.,2011)	ECLIPSE6b	Prescribed surface concentrations
	S7: What emission altitudes (other than surface) are used for each species?
Model	SS	DUST	SO4	OA	BC	NO3	H2O	DMS	NMVOCs	NH3	NOx	CO	CH4
CAM5-ATRAS	Surface level	Surface level	Energy, industrial: 0-0.4 km; Biomass burning: 0-5km; Volcano: 0-7.5km	Biomass burning: 0-5 km	Biomass burning: 0-5 km	N/A	N/A
EC-Earth3-AerChem	As for TM5
ECHAM-HAM	Surface level	Surface level	Surface level, except energy, ships: 2nd model level ~50m, fire emissions: 75 % within the PBL (equally distributed in all levels within the PBL)-17 % in the first level above the PBL-8 % in the second level above the PBL , aircraft and volcanoes: 3D	Surface level, except energy, ships: 2nd model level ~50m, fire emissions: 75 % within the PBL (equally distributed in all levels within the PBL)-17 % in the first level above the PBL-8 % in the second level above the PBL , aircraft and volcanoes: 3D	Surface level, except energy, ships: 2nd model level ~50m, fire emissions: 75 % within the PBL (equally distributed in all levels within the PBL)-17 % in the first level above the PBL-8 % in the second level above the PBL , aircraft and volcanoes: 3D	N/A	N/A	Surface level	N/A	N/A	N/A	N/A	N/A
ECHAM-SALSA	Surface level	Surface level	Surface level, except energy, ships: 2nd model level ~50m, fire emissions: 75 % within the PBL (equally distributed in all levels within the PBL)-17 % in the first level above the PBL-8 % in the second level above the PBL , aircraft and volcanoes: 3D	Surface level, except energy, ships: 2nd model level ~50m, fire emissions: 75 % within the PBL (equally distributed in all levels within the PBL)-17 % in the first level above the PBL-8 % in the second level above the PBL , aircraft and volcanoes: 3D	Surface level, except energy, ships: 2nd model level ~50m, fire emissions: 75 % within the PBL (equally distributed in all levels within the PBL)-17 % in the first level above the PBL-8 % in the second level above the PBL , aircraft and volcanoes: 3D	N/A	N/A
ECMWF-IFS-45R1	Surface level	Surface level	No direct SO4 emissions (all as SO2). Biomass-burning: from GFAS. Volcanic outgassing: prescribed sub-grid volcano heights. Others: surface level	Biomass-burning: from GFAS. Others: surface level	Biomass-burning: from GFAS. Others: surface level	N/A	N/A	Surface level, included directly in SO2 precursor for aerosol purposes	Surface level	Surface level	Aviation: 3D. Others: surface level	Surface level	N/A
ECMWF-IFS-46R1	Surface level	Surface level	No direct SO4 emissions (all as SO2). Biomass-burning: from GFAS. Volcanic outgassing: prescribed sub-grid volcano heights. Others: surface level	Biomass-burning: from GFAS. Others: surface level	Biomass-burning: from GFAS. Others: surface level	No direct NO3 emissions; produced via tropospheric chemistry	N/A	Surface level	Surface level	Surface level	Aviation: 3D. Others: surface level	Surface level	N/A
GEOS	Surface level	Surface level	FF: surface level except energy equally distribted between surface and 500m, BB: equally distributed within PBL, Ship: surface, aircraft and volcano: 3D	FF: surface level except energy equally distributed between surface and 500 m, BB: equally distributed with in PBL, Ship and biogenic: surface, aircraft: 3D	FF: surface level except energy equally distributed between surface and 500 m, BB: equally distributed with in PBL, Ship and biogenic: surface, aircraft: 3D		N/A	surface level	surface level	FF: surface level, BB: equally distributed within PBL	N/A	FF and biogenic emission: surface level, BB: equally distributed within PBL
GFDL-AM4	Surface level	Surface level	Aircraft: 3D (CMIP6), volcanic 3D (Dentener et al., 2006), biomass burning well mixed within PBL, others surface level	Aircraft: 3D (CMIP6), volcanic 3D (Dentener et al., 2006), biomass burning well mixed within PBL, others surface level	Aircraft: 3D (CMIP6), volcanic 3D (Dentener et al., 2006), biomass burning well mixed within PBL, others surface level	N/A	N/A	surface level	N/A	N/A	N/A	N/A
NorESM2	Surface level	Surface level	Aircraft: 3D (CMIP6), volcanic & biomass burning 3D (Dentener et al., 2006), others below 400m	Aircraft: 3D (CMIP6), volcanic & biomass burning 3D (Dentener et al., 2006), others below 400m	Aircraft: 3D (CMIP6), volcanic & biomass burning 3D (Dentener et al., 2006), others below 400m.	N/A	N/A
OsloCTM3	Surface level	Surface level	Anthropogenic SO2 surface level, aircraft according to CEDS, biomass burning SO2 with RETRO vertical distribution	Anthropogenic and biogenic surface level, aircraft according to CEDS; biomass burning with RETRO vertical distribution	Anthropogenic: surface level. Aircraft according to CEDS. Biomass burning with RETRO vertical distribution	N/A	N/A	Surface level	Anthropogenic, biogenic, natural: surface level. Aircraft according to CEDS. Biomass burning with RETRO vertical distribution	Anthropogenic, biogenic, natural: surface level. Aircraft according to CEDS. Biomass burning with RETRO vertical distribution	Anthropogenic, biogenic, natural: surface level. Aircraft according to CEDS. Biomass burning with RETRO vertical distribution	Anthropogenic, biogenic, natural: surface level. Aircraft according to CEDS. Biomass burning with RETRO vertical distribution	N/A
SPRINTARS	Surface level	Surface level	Surface to sigma level of 0.74 from biomass burning; surface level from the other sources.	Surface to sigma level of 0.74 from biomass burning; surface level from the other sources.	Surface to sigma level of 0.74 from biomass burning; surface level from the other sources.			Surface level	Surface level
TM5	As described in Van Noije et al. (2014; Table A1), but with the height distribution of forest firest applied to all CMIP6 biomass burning emissions.
INCA	At altitude is emitted half of the biomass burning, half of organic aerosols, and the aircraft emissions.
GISS-OMA	All emissions at surface, except biomass burning where we distribute them uniformly in the boundary layer.					Agriculture in the lowest 92m; rest anthropogenic as SOx
EMEP	Lowest layer ca. 92m	Lowest layer ca. 92m	96%SO2+4%SO4; Sector dependent: energy production up to 1100m, industrial combustion up to 320m, waste burning upto 530m, rest in the lowest 92m; Eyjafjallajökull 2-8km; degassing Etna, Stromboli- lowest 92m	Traffic and residential in the lowest 92m, other anthropogenic same as SOx, biogenic sources in lowest 92m; forest fiires - within PBL, ca. 2km	Anthropogenic sources and forest fires as OA	N/A	N/A	Model lowest layer 92m	Anthropogenic as SOx (traffic, solvents - surface, lowest 92m layer)	Anthropogenic as SOx, agriculture - surface, model lowest layer 92m		Anthropogenic - sector dependent (as SOx)	N/A

## Sheet: Table OA details
	Specific questions for OA treatment in models
	POA Anthro	POA (oceanic)	POA (wildfires)	SOA Anthro	SOA Biogenic	(SOA wildfires)	SOA online?	OA/OC ratio	SOA/OC ratio
CAM5-ATRAS	Included	Not included	Included	Included as part of OA: formed from oxidation reactions of aromatics, high-alkanes, and high-alkenes (Matsui and Mahowald, 2017; Matsui et al., 2014)	Included as part of OA: formed from oxidation reactions of isoprene and monoterpenes (Matsui and Mahowald, 2017; Matsui et al., 2014)	Included as part of OA: formed from oxidation reactions of semivolatile and intermediate volatility organice compounds (S/IVOCs) (Matsui and Mahowald, 2017; Matsui et al., 2014)	Calculated online from oxidations of precursor anthropogenic and biogenic VOCs and S/IVOCs	N/A	N/A
EC-Earth3-AerChem	As for TM5.
TM5	Included	Not included	Included	Not included: isoprene and monoterpenes are not included in the CEDS data set of anthropogenic emissions used in CMIP6.	Calculated online based on MEGANv2.1 isoprene and monoterpene emissions (see emissions)	Calculated online based on CMIP6 wildfire isoprene and monoterpene emissions (see emissions)	SOA is calculated online from the emissions of isoprene and monoterpenes, following Bergman et al. (in preparation).	N/A	N/A
ECHAM-HAM	Included	Not included	Included	Not included	Included as part of "particulate organic matter"; 15 % of the natural terpene emissions at the surface of Dentener et al. (2006) are assumed to form SOA and condense immediately on existing aerosol particles	Not included	emissions are prescribed	N/A	N/A
ECHAM-SALSA	Included	Not included	Included	Not included	Included as part of "particulate organic matter"; 15 % of the natural terpene emissions at the surface of Dentener et al. (2006) are assumed to form SOA and condense immediately on existing aerosol particles	Not included	emissions are prescribed	N/A	N/A
ECMWF-IFS-45R1	Included	Not included	Included	Included as part of the "Organic Matter species" (which also includes POA); not produced but emitted using CO-scaled emissions (Spracklen et al. 2011)	Included as part of the "organic matter species"; not produced but emitted using Dentener06 emissions	not included	N/A	N/A	N/A
ECMWF-IFS-46R1	Included	Not included	Included	Included as part of the "Organic Matter species" (which also includes POA); not produced but emitted using CO-scaled emissions (Spracklen et al. 2011)	Included as part of the "organic matter species"; not produced but emitted using Dentener06 emissions	not included	N/A	N/A	N/A
EMEP	From Eclipse6b	Not included	Yes (from FINN) OA/OC=1.7	Yes (from Eclipse6b NMVOVs, using VBS)	Yes (from biogenic VOCs using VBS, Simpson etal, 2011)	Not included	Yes. VBS scheme (Robinson et al., 2007; Donahue et al., 2009)	OA/OC is applied on emissions; OA and OC are calculated as separate species	N/A
GEOS	included (with aircraft source)	No oceanic emitted POA, but including shipping emission	included	CO-based emission and reaction with OH based on Hodzic and Jimenez (2011) and Kim et al. (2015)	MEGAN isoprene (0.05 yield) and monopterpene (0.03 yield)	CO-based emission and reaction with OH based on Hodzic and Jimenez (2011) and Kim et al. (2015)	YES	OA/OC = 1.8	SOA/OC = 1.8
GFDL-AM4	Included	Included	Included	Included via reaction of C4H10+OH with 0.1 yields	Inlcuded via emissions of isoprene and monoterpenes with 0.1 yields (MEGAN)	Not inlcuded	yes	OA/OM=1.4 for fossil fiel, 1.6 for biomss burning, 1.4 for biogenic emissions	N/A
GISS-OMA	Included	Not included	included	Included	Included online using MEGAN		Yes	OA/OC = 1.4	N/A
INCA	N/A	N/A	N/A	N/A	N/A	N/A	N/A	N/A	N/A
NorESM2	Included	Included	Included	Not included	Included via online emissions of isoprene and monoterpenes (MEGANv2.1)	Not included	Included via online emissions of isoprene and monoterpenes (MEGANv2.1)	OA/OC ratio is 2.6 for biomass burning, and 1.4 for fossil emissions; the model describes the evolution of OM (not OC)
OsloCTM3	Included	Incuded	Included	Included	Included	Included similar to SOA Biogenic	Yes	OA provided in the emission	1,8
SPRINTARS	Included	Included based on Gantt et al. (2011).	Included	Not included	Included with monthly mean precursor terpene and isoprene using the GEIA database (Guenther et al. (1995)) for land vegetation and based on Gantt et al. (2009).	Not included	Oceanic emissions are online, the others are prescribed.	N/A	N/A
