# Supplementary material for: AeroCom phase III multi-model evaluation of the aerosol life cycle and optical properties using ground- and space-based remote sensing as well as surface in situ observations
Source: Copernicus journal article supplement (doi:10.5194/acp-21-87-2021), 2021-01-06
Supplement: Supplementary file 1 [file acp-21-87-2021-supplement.zip › supplement2.pdf]

## S1 GAW in-situ site details

The following 2 tables contain information about the individual GAW sites used, both for absorption and scattering coefficient measurements. The data were accessed through the EBAS database (<http://ebas.nilu.no/>).

### S1.1 Absorption coefficient data

Table S1: GAW site details for in-situ dry absorption coefficient data. Start and Stop indicate first and last available months for computation of climatology in the 2005–2015 time frame.  $\lambda$  provides measurement wavelengths (multiple wavelengths can occur, e.g. in case instruments were changed / updated over time). Cov. indicates the percentage loss of daily average values when requiring 25% coverage in the provided hourly data. The following sites did not meet the coverage constraints for the computation of the climatology: Egbert, Finokalia.

| #  | Station name      | Lat.   | Lon.    | Alt. [m] | Start   | Stop    | $\lambda$ [nm]      | Cov. [%] |
|----|-------------------|--------|---------|----------|---------|---------|---------------------|----------|
| 1  | Alert             | 82.50  | -62.34  | 420      | 2005/01 | 2014/12 | 528;<br>520;<br>530 | 96       |
| 2  | Anmyeon-do        | 36.54  | 126.33  | 56       | 2008/01 | 2014/12 | 520;<br>880         | 99       |
| 3  | Annaberg-Buchholz | 50.57  | 13.00   | 549      | 2012/01 | 2013/12 | 637                 | 100      |
| 4  | Aspvreten         | 58.80  | 17.38   | 20       | 2008/05 | 2013/12 | 550                 | 99       |
| 5  | Barrow            | 71.32  | -156.61 | 21       | 2005/01 | 2014/12 | 528;<br>530;<br>520 | 93       |
| 6  | Birkenes II       | 58.39  | 8.25    | 223      | 2008/05 | 2014/12 | 522                 | 99       |
| 7  | Bondville         | 40.05  | -88.37  | 223      | 2005/01 | 2014/12 | 528;<br>530         | 99       |
| 8  | Bösel             | 53.00  | 7.94    | 40       | 2009/01 | 2013/06 | 670                 | 100      |
| 9  | Cabauw Zijdweg    | 51.97  | 4.93    | 1        | 2008/01 | 2013/12 | 670                 | 100      |
| 10 | Cape Point        | -34.35 | 18.49   | 230      | 2005/11 | 2013/09 | 530                 | 98       |
| 11 | Cape San Juan     | 18.38  | -65.62  | 75       | 2006/05 | 2014/11 | 528;<br>530         | 97       |
| 12 | DEM_Athens        | 37.99  | 23.82   | 280      | 2012/01 | 2014/12 | 520                 | 100      |
| 13 | Danum Valley      | 4.98   | 117.85  | 427      | 2011/01 | 2012/12 | 670                 | 100      |
| 14 | El Arenosillo     | 37.10  | -6.73   | 51       | 2012/07 | 2014/12 | 528                 | 100      |
| 15 | Gosan             | 33.29  | 126.16  | 81       | 2011/10 | 2014/12 | 528                 | 99       |
| 16 | Gual Pahari       | 28.43  | 77.15   | 320      | 2007/12 | 2010/01 | 670                 | 74       |
| 17 | Harwell           | 51.57  | -1.32   | 137      | 2009/11 | 2010/12 | 370                 | 100      |
| 18 | Hohenpeissenberg  | 47.80  | 11.01   | 1000     | 2005/01 | 2014/12 | 660                 | 100      |
| 19 | Hyytiälä          | 61.85  | 24.28   | 185      | 2006/05 | 2014/12 | 520;<br>637;<br>530 | 99       |
| 20 | Ispra             | 45.80  | 8.63    | 213      | 2005/01 | 2014/12 | 520;<br>670         | 100      |
| 21 | K-pusztá          | 46.97  | 19.58   | 135      | 2008/04 | 2014/12 | 528                 | 97       |

Continued on next page

Table S1: GAW site details for in-situ dry absorption coefficient data. Start and Stop indicate first and last available months for computation of climatology in the 2005–2015 time frame.  $\lambda$  provides measurement wavelengths (multiple wavelengths can occur, e.g. in case instruments were changed / updated over time). Cov. indicates the percentage loss of daily average values when requiring 25% coverage in the provided hourly data. The following sites did not meet the coverage constraints for the computation of the climatology: Egbert, Finokalia.

| #  | Station name                            | Lat.   | Lon.    | Alt. [m] | Start   | Stop    | $\lambda$ [nm]      | Cov. [%] |
|----|-----------------------------------------|--------|---------|----------|---------|---------|---------------------|----------|
| 22 | Kosetice (NOAK)                         | 49.57  | 15.08   | 539      | 2012/09 | 2013/12 | 520                 | 99       |
| 23 | Leipzig                                 | 51.35  | 12.43   | 131      | 2009/01 | 2014/12 | 670                 | 100      |
| 24 | Leipzig-Mitte                           | 51.34  | 12.38   | 115      | 2010/06 | 2014/12 | 670                 | 100      |
| 25 | Leipzig-West                            | 51.32  | 12.30   | 126      | 2013/01 | 2014/12 | 670                 | 99       |
| 26 | Mace Head                               | 53.33  | -9.90   | 5        | 2009/01 | 2010/12 | 670                 | 100      |
| 27 | Melpitz                                 | 51.53  | 12.93   | 90       | 2007/01 | 2014/12 | 670                 | 100      |
| 28 | Montseny                                | 41.77  | 2.35    | 710      | 2009/01 | 2014/12 | 637;<br>670;<br>520 | 100      |
| 29 | Neumayer                                | -70.67 | -8.27   | 50       | 2006/03 | 2014/12 | 637;<br>670         | 100      |
| 30 | Observatoire Perenne de l'Environnement | 48.56  | 5.51    | 396      | 2012/09 | 2014/12 | 520                 | 99       |
| 31 | Pallas (Sammaltunturi)                  | 67.97  | 24.12   | 572      | 2007/09 | 2014/12 | 637                 | 100      |
| 32 | Preila                                  | 55.38  | 21.03   | 5        | 2010/03 | 2010/12 | 520                 | 100      |
| 33 | SIRTA Atmospheric Research Observatory  | 48.71  | 2.16    | 168      | 2012/01 | 2012/12 | 520                 | 99       |
| 34 | Southern Great Plains E13               | 36.60  | -97.48  | 328      | 2005/01 | 2014/12 | 530                 | 96       |
| 35 | Tiksi                                   | 71.59  | 128.92  | 18       | 2007/05 | 2014/12 | 520                 | 98       |
| 36 | Trinidad Head                           | 41.05  | -124.15 | 117      | 2005/01 | 2014/12 | 528;<br>530         | 98       |
| 37 | Vavihill                                | 56.02  | 13.15   | 175      | 2008/05 | 2011/12 | 520                 | 98       |
| 38 | Waldhof                                 | 52.80  | 10.76   | 78       | 2013/01 | 2014/09 | 670                 | 100      |
| 39 | Zeppelin mountain (Ny-Ålesund)          | 78.91  | 11.89   | 478      | 2005/01 | 2014/12 | 520;<br>525         | 100      |

## 5 S1.2 Scattering coefficient data

Table S2: GAW site details for in-situ dry scattering coefficient data. Start and Stop indicate first and last available months for computation of climatology in the 2005–2015 time frame.  $\lambda$  provides measurement wavelengths (multiple wavelengths can occur, e.g. in case instruments were changed / updated over time). Cov. indicates the percentage loss of daily average values when requiring 25% coverage in the provided hourly data. The following sites did not meet the coverage constraints for the computation of the climatology: Columbia River Gorge, East Trout Lake, Great Gulf Wilderness, Preila.

| #  | Station name                                      | Lat.   | Lon.    | Alt. [m] | Start   | Stop    | $\lambda$ [nm] | Cov. [%] |
|----|---------------------------------------------------|--------|---------|----------|---------|---------|----------------|----------|
| 1  | Acadia National Park-McFarland Hill (ME98)        | 44.38  | -68.26  | 150      | 2005/01 | 2014/09 | 550            | 56       |
| 2  | Alert                                             | 82.50  | -62.34  | 420      | 2005/01 | 2014/12 | 550            | 96       |
| 3  | Anmyeon-do                                        | 36.54  | 126.33  | 52       | 2008/01 | 2014/10 | 550            | 92       |
| 4  | Barrow                                            | 71.32  | -156.61 | 21       | 2005/01 | 2014/12 | 550            | 85       |
| 5  | Birkenes II                                       | 58.39  | 8.25    | 223      | 2010/01 | 2014/12 | 550            | 98       |
| 6  | Bondville                                         | 40.05  | -88.37  | 223      | 2005/01 | 2014/12 | 550            | 96       |
| 7  | Cabauw Zijdeweg                                   | 51.97  | 4.93    | 1        | 2008/01 | 2012/12 | 550            | 99       |
| 8  | Cape Point                                        | -34.35 | 18.49   | 260      | 2006/01 | 2013/09 | 550            | 88       |
| 9  | Cape San Juan                                     | 18.38  | -65.62  | 75       | 2005/03 | 2014/10 | 550            | 72       |
| 10 | Cedar Bluff                                       | 38.77  | -99.76  | 665      | 2005/01 | 2007/07 | 550            | 65       |
| 11 | Cohutta                                           | 34.79  | -84.63  | 735      | 2005/01 | 2007/03 | 550            | 64       |
| 12 | DEM_Athens                                        | 37.99  | 23.82   | 280      | 2012/01 | 2014/12 | 525;<br>520    | 98       |
| 13 | El Arenosillo                                     | 37.10  | -6.73   | 51       | 2006/01 | 2014/12 | 550            | 85       |
| 14 | Finokalia                                         | 35.32  | 25.67   | 255      | 2013/01 | 2014/12 | 550            | 99       |
| 15 | Glacier National Park-Fire Weather Station (MT05) | 48.51  | -114.00 | 980      | 2008/03 | 2012/06 | 550            | 55       |
| 16 | Gosan                                             | 33.29  | 126.16  | 81       | 2011/09 | 2014/12 | 550            | 98       |
| 17 | Great Smoky Mountains NP                          | 35.63  | -83.94  | 813      | 2005/01 | 2014/12 | 550            | 53       |
| 18 | Hohenpeissenberg                                  | 47.80  | 11.01   | 985      | 2006/01 | 2014/11 | 550            | 97       |
| 19 | Hyytiälä                                          | 61.85  | 24.28   | 185      | 2010/12 | 2014/12 | 550            | 100      |
| 20 | Ispra                                             | 45.80  | 8.63    | 214      | 2005/01 | 2014/12 | 550            | 94       |
| 21 | K-pusza                                           | 46.97  | 19.58   | 135      | 2008/04 | 2014/12 | 550            | 98       |
| 22 | Kosetice (NOAK)                                   | 49.57  | 15.08   | 539      | 2012/08 | 2014/12 | 550            | 94       |
| 23 | Mace Head                                         | 53.33  | -9.90   | 15       | 2005/01 | 2013/12 | 550            | 96       |
| 24 | Mammoth Cave National Park-Houchin Meadow         | 37.13  | -86.15  | 236      | 2005/01 | 2014/11 | 550            | 56       |
| 25 | Melpitz                                           | 51.53  | 12.93   | 90       | 2012/01 | 2012/12 | 550            | 100      |
| 26 | Montseny                                          | 41.77  | 2.35    | 710      | 2010/01 | 2014/12 | 525            | 97       |
| 27 | Mount Rainier National Park-Tahoma Woods (WA99)   | 46.76  | -122.12 | 427      | 2005/03 | 2014/11 | 550            | 47       |
| 28 | Neumayer                                          | -70.67 | -8.27   | 50       | 2013/01 | 2014/12 | 550            | 100      |
| 29 | Observatoire Perenne de l'Environnement           | 48.56  | 5.51    | 396      | 2012/09 | 2014/12 | 525            | 92       |

Continued on next page

Table S2: GAW site details for in-situ dry scattering coefficient data. Start and Stop indicate first and last available months for computation of climatology in the 2005–2015 time frame.  $\lambda$  provides measurement wavelengths (multiple wavelengths can occur, e.g. in case instruments were changed / updated over time). Cov. indicates the percentage loss of daily average values when requiring 25% coverage in the provided hourly data. The following sites did not meet the coverage constraints for the computation of the climatology: Columbia River Gorge, East Trout Lake, Great Gulf Wilderness, Preila.

| #  | Station name                           | Lat.  | Lon.    | Alt. [m] | Start   | Stop    | $\lambda$ [nm] | Cov. [%] |
|----|----------------------------------------|-------|---------|----------|---------|---------|----------------|----------|
| 30 | Organ Pipe Cactus National Monument    | 31.95 | -112.80 | 506      | 2005/01 | 2010/05 | 550            | 92       |
| 31 | Pallas (Sammaltunturi)                 | 67.97 | 24.12   | 572      | 2005/01 | 2014/12 | 550            | 97       |
| 32 | SIRTA Atmospheric Research Observatory | 48.71 | 2.16    | 168      | 2012/05 | 2013/12 | 525;<br>450    | 91       |
| 33 | Seney NWR                              | 46.29 | -84.05  | 216      | 2005/03 | 2006/06 | 550            | 47       |
| 34 | Southern Great Plains E13              | 36.60 | -97.48  | 328      | 2005/01 | 2014/12 | 550            | 94       |
| 35 | Trinidad Head                          | 41.05 | -124.15 | 117      | 2005/01 | 2014/12 | 550            | 98       |
| 36 | Upper Buffalo Wilderness               | 35.83 | -93.20  | 722      | 2005/02 | 2009/09 | 550            | 54       |
| 37 | Vavihill                               | 56.02 | 13.15   | 180      | 2012/01 | 2014/03 | 520            | 94       |
| 38 | Wichita Mountains                      | 34.73 | -98.71  | 509      | 2005/01 | 2007/08 | 550            | 77       |
| 39 | Zeppelin mountain (Ny-Ålesund)         | 78.91 | 11.89   | 474      | 2010/07 | 2013/12 | 550            | 100      |

## S2 Evaluation of satellite products at AERONET stations

All satellite data sets (see Table 1 in main manuscript) that were used for the model evaluation were evaluated themselves against the ground based AERONET data. This was done in order to establish an estimate of the relative differences (biases, correlation coefficients) between the different data sets when comparing them with the models (e.g. a difference in model bias against AERONET and a satellite product may be due to differences in spatio-temporal sampling, but may also resemble a systematic bias in the satellite dataset due to retrieval errors). The evaluation of the gridded satellite level 3 products against AERONET was performed in the same manner as the evaluation of the models (see Sect. 2.3 in main manuscript). Note that for this analysis the satellite data were used in the original  $1^\circ \times 1^\circ$  resolution.

The results of this analysis are available online on the AeroCom satellite evaluation website (Mortier et al., 2020), allowing interactive exploration of the data and evaluation metrics (see Sect. 2.3 in the main manuscript for details regarding the web-interface). Note that the website contains results from more satellites than were used in this article.

In addition, the retrieved network averaged normalised-mean-biases (NMBs) from this assessment of the 2010 satellite records are provided in Table 1 in the main manuscript.

The retrieved correlation (metric R) against the AERONET observations are generally high ( $R > 0.80$ ) with highest correlation ( $R = 0.89$ ) being found for the merged satellite dataset (Sogacheva et al., 2020), suggesting that the satellites are capable of monitoring spatio-temporal variations in the AOD signal. In terms of NMB, AATSR-SU and the MERGED-FMI product show slight underestimations ( $\text{NMB} \approx -5\%$ ) while MODIS Aqua and Terra yield slight overestimates AODs, approximately  $+9\%$  and  $+17\%$ , respectively (see product names M6.1-Aq-DTDB, M6.1-Tr-DTDB in Mortier et al., 2020).

This analysis is biased by the uneven distribution of AERONET sites (highest density in Europe and North America) and thus some problematic regions in the satellite retrievals (e.g., regions with high surface albedo, such as the Sahara desert) may not be well represented in this comparison. In addition, this assessment provides little insights about the satellite performance over oceans (sea salt dominated), since the AERONET site coverage is land dominated.

In the case of the AATSR-SU data, the retrieval includes a conservative cloud mask utilising thermal channels in addition to optical, and thereby avoids retrieval near cloud edges. Evaluation under aerosol CCI of six data sets showed AATSR and SeaWiFS exhibited the lowest bias (with SeaWiFS) with respect to ocean and coastal sun photometers Popp et al. (2016).

### S3 Spatio-temporal sensitivity of satellite evaluation results

The established metrics (e.g., NMB, R) retrieved when comparing models with level 3 gridded satellite datasets (see e.g. Fig. 6 in main manuscript) are sensitive to the temporal and spatial resolution used. Since many AP3-CTRL model outputs were provided only in monthly resolution fields, all statistics were computed in monthly resolution. Further, as described above, the satellite products were spatially re-gridded to a latitude / longitude resolution of  $5^\circ \times 5^\circ$  in order to increase the temporal coverage and to aggregate enough measurements to meet the required 25 % time sampling constraint in each grid point, for monthly averaging (for details see main manuscript). In order to investigate the impacts of this choice of spatio-temporal resolution, a further sensitivity study was performed. For all models (and variables) that have submitted data also in daily (or higher) resolution, the analysis was repeated in the highest available resolution (i.e.  $1^\circ \times 1^\circ$  for models with higher resolution, else, native model resolution). Table S3 summarizes the differences from this study. In most cases NMBs are shifted towards more positive values for the higher resolution dataset, with differences of up to +13 % (AOD ECMWF-IFS vs. MODIS satellites). This positive shift usually conducts to lower absolute biases as most models underestimate the considered variables. In general, it appears that the bias shift is larger in the higher resolution models, however, correlation coefficients are slightly worse in high resolution dataset. The latter is expected due to the smoothing effect that temporal and spatial averaging has on the results (i.e. it is easier for a model to match a monthly average within a 500x500km grid box than a daily average in a 100x100km grid box).

**Table S3.** Comparison of statistics (NMB and R) retrieved when co-locating models with satellite data a) in *Low* resolution, that is, using monthly means and re-gridding to  $5^\circ \times 5^\circ$  horizontally (with 25 % temporal sampling coverage requirement, as done in this study) and b) in *High* resolution, that is, using daily means and highest available horizontal resolution (*High*).

| Model (Lat./Lon. res.) | Satellite      | Statistic:<br>Resolution:<br>Variable | NMB [%] |        | R    |      |
|------------------------|----------------|---------------------------------------|---------|--------|------|------|
|                        |                |                                       | Low     | High   | Low  | High |
| CAM5-ATRAS (1.9 x 2.5) | AATSR4.3-SU    | AOD                                   | -17.65  | -18.31 | 0.66 | 0.50 |
|                        | MODIS6.1-aqua  | AOD                                   | -36.42  | -30.67 | 0.57 | 0.35 |
|                        | MODIS6.1-terra | AOD                                   | -42.16  | -36.70 | 0.55 | 0.34 |
| ECMWF-IFS (0.4 x 0.4)  | AATSR4.3-SU    | AE                                    | -38.80  | -28.63 | 0.70 | 0.59 |
|                        |                | AOD                                   | -18.15  | -18.73 | 0.82 | 0.70 |
|                        |                | AOD <sub>c</sub>                      | 14.51   | 5.69   | 0.78 | 0.66 |
|                        |                | AOD <sub>f</sub>                      | -39.84  | -36.20 | 0.81 | 0.66 |
|                        | MODIS6.1-aqua  | AOD                                   | -34.25  | -21.79 | 0.71 | 0.57 |
|                        | MODIS6.1-terra | AOD                                   | -40.18  | -27.55 | 0.69 | 0.56 |
| EMEP (0.5 x 0.5)       | AATSR4.3-SU    | AE                                    | 36.57   | 42.61  | 0.67 | 0.50 |
|                        |                | AOD                                   | -34.40  | -30.38 | 0.73 | 0.58 |
|                        |                | AOD <sub>c</sub>                      | -69.81  | -69.25 | 0.64 | 0.54 |
|                        |                | AOD <sub>f</sub>                      | -10.88  | -2.56  | 0.74 | 0.57 |
|                        | MODIS6.1-aqua  | AOD                                   | -44.31  | -36.49 | 0.68 | 0.51 |
|                        | MODIS6.1-terra | AOD                                   | -49.31  | -41.25 | 0.66 | 0.50 |
| OsloCTM3 (2.2 x 2.2)   | AATSR4.3-SU    | AOD                                   | -12.35  | -13.43 | 0.83 | 0.69 |
|                        | MODIS6.1-aqua  | AOD                                   | -25.14  | -23.65 | 0.76 | 0.55 |
|                        | MODIS6.1-terra | AOD                                   | -31.88  | -30.32 | 0.74 | 0.53 |
| SPRINTARS (0.6 x 0.6)  | AATSR4.3-SU    | AE                                    | -8.13   | 0.88   | 0.68 | 0.55 |
| TM5 (2.0 x 3.0)        | AATSR4.3-SU    | AE                                    | 2.92    | 8.71   | 0.74 | 0.62 |
|                        |                | AOD                                   | -1.84   | -3.93  | 0.75 | 0.55 |
|                        |                | AOD <sub>c</sub>                      | -9.76   | -14.64 | 0.64 | 0.41 |
|                        |                | AOD <sub>f</sub>                      | 3.42    | 3.42   | 0.81 | 0.66 |
|                        | MODIS6.1-aqua  | AOD                                   | -18.78  | -15.83 | 0.79 | 0.55 |
|                        | MODIS6.1-terra | AOD                                   | -26.09  | -22.84 | 0.76 | 0.53 |

## S4 Models

The following sub-sections briefly introduce each of the individual models used in the paper (see also Tab. 2 in the main manuscript and supplement 1 for further information).

### 50 S4.1 CAM5-ATRAS

The Community Atmosphere Model version 5 (CAM5) with the Aerosol Two-dimensional bin module for foRmation and Aging Simulation (ATRAS, Matsui, 2017; Matsui and Mahowald, 2017) calculates the following atmospheric aerosol and chemistry processes: emissions, gas-phase chemistry, new particle formation, condensation of sulphate, nitrate, and organic aerosols, coagulation, cloud activation, aqueous-phase chemistry, dry and wet deposition, and aerosol-radiation and aerosol-  
55 cloud interactions. Aerosol particles from 1 nm to 10000 nm in dry diameter are represented with a two-dimensional sectional representation with 12 size bins and 8 BC mixing state bins. Meteorological nudging was used for temperature and wind fields in the free troposphere (<800 hPa) using data from the Modern-Era Retrospective Analysis for Research and Applications version 2 (MERRA2, Gelaro et al., 2017). Aerosol optical properties are calculated based on the Mie theory with the core-shell (BC core and non-BC shell) treatment for internally-mixed BC particles and the well-mixed treatment for pure BC and BC-free  
60 particles (Matsui, 2017) .

### S4.2 EC-Earth3-AerChem and TM5

Two configurations of the atmospheric composition model TM5 (Tracer Model 5) are included in this study (van Noije et al., 2014): a standalone version of TM5, and an atmosphere-only version of the CMIP6 climate model EC-Earth3-AerChem (van Noije et al., 2020). The standalone model is driven by meteorological and surface fields from the ERA-Interim reanalysis (Dee  
65 et al., 2011), whereas in the climate model there is online interaction between TM5 and the atmospheric general circulation model, which is based on model cycle 36r4 of ECMWF's Integrated Forecasting System (IFS). The sets of meteorological and surface variables that drive TM5 are similar in both configurations. In the EC-Earth simulations analyzed in this study, sea surface temperatures and sea ice concentrations were prescribed using forcing fields from the Atmospheric Model Intercomparison Project (AMIP, Gates et al., 1999) provided for CMIP6; in addition, vorticity, divergence and surface pressure fields were  
70 nudged to ERA-Interim, using a Newtonian relaxation scheme with a time constant of 8h and 15min in the whole atmosphere. TM5 uses the aerosol scheme M7 (Vignati et al., 2004), which represents sulphate, black carbon, organic aerosols, sea salt and mineral dust with seven lognormal size distributions or modes. Aerosol components are assumed to be internally mixed inside the modes. The formation of secondary organic aerosols in the atmosphere is described following Bergman et al. (2020). Ammonium-nitrate and methane sulphonic acid (MSA) are described by their total mass, and assumed to be present only in  
75 the soluble accumulation mode (see van Noije et al., 2020, for more details). TM5 has an interactive tropospheric chemistry scheme (Williams et al., 2017), which also describes the aqueous-phase oxidation of dissolved sulphur dioxide in clouds. When calculating the dust source, TM5 does not include particles with dry diameter larger than 16  $\mu\text{m}$ . The aerosol optical properties in TM5 are calculated based on Mie theory, where the mixing rules of Bruggeman and Maxwell Garnett are applied as approximations of the refractive index of the internally mixed modes.

### 80 S4.3 ECHAM-HAM

The global aerosol-climate model ECHAM6.3-HAM2.3 (ECHAM-HAM in the following) is part of the fully coupled aerosol chemistry climate model ECHAM-HAMMOZ (Tegen et al., 2019; Schultz et al., 2018). ECHAM-HAM uses the PSrad two-stream radiation scheme which uses 16 shortwave and 14 longwave wavelength bands (Pincus and Stevens, 2013). Aerosol microphysical processes in ECHAM-HAM are described with the modal M7 aerosol model (Vignati et al., 2004) in contrast to  
85 ECHAM-SALSA which employs the sectional aerosol scheme SALSA (Kokkola et al., 2018). The aerosol size distribution is represented by seven lognormal modes (four soluble and three insoluble modes) and the aerosol components include sulphate, black carbon, particulate organic matter, sea salt, mineral dust and aerosol water. The aerosol optical properties are computed for each mode using volume weighted mixing of the refractive indices of the aerosol components. Pre-computed values based on Mie theory of the aerosol optical properties are read from a look-up table using the Mie size-parameter and the volume

90 weighted refractive index (real and imaginary part) of each mode for each wavelength band. Aerosol water uptake follows  $\kappa$ -Köhler theory (Petters and Kreidenweis, 2007) and is computed from the chemical composition of each mode and ambient relative humidity of the cloud-free part of the grid box (O'Donnell et al., 2011). The aerosol representation in ECHAM-HAM has been evaluated in Tegen et al. (2019) but using different aerosol emissions (different inventories for anthropogenic and biomass burning emissions as well as a different sea salt emission parameterisation). For the AP3-CTRL experiment the sea  
95 salt emission parameterisation from Guelle et al. (2001) was chosen, firstly because the one proposed by Long et al. (2011) (with temperature correction of Sofiev et al., 2011) resulted in an underestimation of the sea salt concentrations (Tegen et al., 2019) and secondly, to be consistent with the AP3-CTRL setup of ECHAM-SALSA (Sect. S4.4). However, this comes at the price of larger sea salt particles (on average), resulting in a slightly decreased correlation against AERONET compared to Tegen et al. (2019). Mineral dust emissions are computed online from the 10 m wind speed, only in predefined potential dust  
100 source areas (Tegen et al., 2002; Cheng et al., 2008; Heinold et al., 2016). Dust emission fluxes are computed internally well size-resolved and are subsequently remapped and emitted to the two largest M7 insoluble modes using mass median emission radii of  $0.37\ \mu\text{m}$  and  $1.75\ \mu\text{m}$  with standard deviations of 1.59 and 2.00 respectively. The experiment analysed in this study was performed at T63 spectral horizontal resolution ( $1.875^\circ \times 1.875^\circ$ ) with 47 vertical hybrid-sigma levels with a model top at 0.01 hPa. Vorticity, divergence and surface pressure were nudged towards ERA-Interim (Dee et al., 2011) using relaxation  
105 times of 6 h, 48 h and 24 h respectively and sea surface temperature and sea ice cover are prescribed from AMIP data for the respective year (Taylor et al., 2000).

#### S4.4 ECHAM-SALSA

SALSA is the sectional aerosol microphysics module within the ECHAM-HAMMOZ aerosol-chemistry-climate model (Kokkola et al., 2018) alongside the modal aerosol module M7 (Tegen et al., 2019). The implementation of SALSA to ECHAM-  
110 HAMMOZ and its evaluation against satellite retrievals, ground-based remote sensing retrievals, and in situ observations has been described by Kokkola et al. (2018). One change in these model simulations compared to those in Kokkola et al. (2018) are, in addition to using anthropogenic emissions required for AeroCom phase III simulations, is using sea salt emission parameterisation of Guelle et al. (2001) for the reasons described in the previous Section S4.3.

#### S4.5 ECMWF-IFS

115 As part of the Copernicus Atmosphere Monitoring Service (CAMS; <https://atmosphere.copernicus.eu/>), ECMWF runs a version of the IFS model that includes prognostic aerosol and tropospheric chemistry schemes to produce global forecasts of atmospheric composition. The underlying meteorological model is essentially identical to that used for operational medium-range weather forecasting and is documented at <https://www.ecmwf.int/en/forecasts/documentation-and-support>, but at a lower resolution of 40 km to offset the cost of the extra schemes. The results presented here are from a “cycling forecast” configuration, that is, a forecast with free-running aerosols and chemical species (no assimilation of atmospheric composition), with  
120 meteorology reinitialised at 00 UTC each day from operational ECMWF analyses. The model version used in this paper is cycle 46R1.<sup>1</sup>

The aerosol component is described in Rémy et al. (2019) and based on the earlier work of Morcrette et al. (2009). This is an externally-mixed hybrid bin / bulk scheme, consisting of three size bins each for desert dust (up to  $20\ \mu\text{m}$  dry radius) and sea salt  
125 (up to  $20\ \mu\text{m}$  radius at 80 % relative humidity), and bulk tracers for organic matter, black carbon, sulphate, nitrate (from gas-particle partitioning and heterogeneous reactions at the surface of dust and sea-salt aerosol particles) and ammonium aerosol. For organic matter and black carbon, there are separate hydrophobic and hydrophilic tracers, with a fixed *ageing* timescale for conversion of the former to the latter. Sulphate production rates are provided by the global chemistry component of the IFS, IFS-CB05. There is no primary sulphate aerosol emission. The tropospheric chemistry scheme is described in Flemming et al.  
130 (2015); in the model version used for AP3-CTRL simulations it is directly coupled to the aerosol scheme by providing the precursor gases for the reactions that produce nitrate and ammonium as well as the sulphate production rates.

<sup>1</sup> Note that the ECMWF-IFS model version was updated during revision (i.e., cycle 45R1 was used in the discussion paper, Gliß et al., 2020).

## S4.6 EMEP MSC-W

The EMEP MSCW model is a chemical transport model, designed for policy related applications to combat acid deposition, eutrophication and health adverse air pollution (Simpson et al., 2012). It accounts for all main anthropogenic ( $\text{SO}_4$ ,  $\text{NO}_3$ ,  $\text{NH}_4$ , BC and OC) and natural (SS, DU, biogenic SOA) aerosols, contributing to the health related indicators  $\text{PM}_{2.5}$  and  $\text{PM}_{10}$ . The results presented in the paper were obtained in a model run at  $0.5 \times 0.5^\circ$  grid, driven by 3-hourly ECMWF-IFS meteorology and using (differently from the other models) ECLIPSE6b annual anthropogenic emissions with EMEP default monthly profiles, ECLIPSE6a for international shipping, and FINN forest fire emissions (Wiedinmyer et al., 2011), all for the year 2010. The model includes aerosols with diameters up to  $10 \mu\text{m}$  and calculates the mass concentrations of aerosols in fine (below  $\text{PM}_{2.5}$ ) and and coarse  $\text{PM}_{2.5-10}$  mode. Based on these, the extinction and absorption coefficients are calculated for the individual aerosol components using mass extinction/absorption coefficients, implicitly accounting for aerosol hygroscopic growth (aerosol effective radii, growth factors and specific extinction efficiencies are tabulated, Schulz et al., 2012). The results in this paper indicate an inconsistency between MEC and MAC for BC (see Tab. 3 in main manuscript). This is likely due to the fact that MAC is a constant value in EMEP, selected from a range of values reported in (Bond et al., 2013). MEC, on the other hand, is computed online based on extinction efficiencies from (Hess et al., 1998) and (Chin et al., 2002) to account for hygroscopic growth.

## S4.7 GEOS

GEOS is a global Earth system model, containing components for atmospheric circulation and composition, ocean circulation and biogeochemistry, land surface processes, and data assimilation (Rienecker et al., 2008). The version of GEOS Earth System Model (with a GOCART aerosol module) used for this study is *Icarus-3\_3\_p2*. The simulations run at a latitude/longitude resolution of  $1.0^\circ \times 1.0^\circ$  and 72 vertical levels from surface up to 0.01 hPa ( $\sim 85 \text{ km}$ ) with “replay” mode, denoting simulations driven by the reanalysis meteorological fields from MERRA2.

The GOCART module includes major aerosol types of BC, organic carbon (OC, see supplement 1 for assumed OC to OA ratios), brown carbon (BrC),  $\text{SO}_4$ ,  $\text{NO}_3$ ,  $\text{NH}_4$ , DU, and SS (Chin et al., 2002; Colarco et al., 2010; Bian et al., 2019). The emissions of dust, sea salt, DMS, and biogenic VOCs are model calculated time-varying fields. All other aerosol emissions used in this study follow the AeroCom phase III protocol. The major updates on this GOCART version include newly implemented nitrate and ammonium (Bian et al., 2017), anthropogenic and biomass burning SOAs, as well as separate treatment of optical properties for BrC (from biomass burning source) and OC (from all other sources).

## S4.8 GFDL-AM4

The Geophysical Fluid Dynamics Laboratory Atmospheric Model version 4 has cubed-sphere topology with  $96 \times 96$  grid boxes per cube face (approximately 100 km grid size) and 33 levels in the vertical, contains an aerosol bulk model that generates mass concentration of aerosol fields (sulphate, carbonaceous aerosols, sea salt and dust) from emissions and a “light” chemistry mechanism designed to support the aerosol model but with prescribed ozone and radicals (Zhao et al., 2018). The model is driven by time-varying boundary conditions, and natural and anthropogenic forcings developed in support of CMIP6 (Eyring et al., 2016), except for ship emission of  $\text{SO}_2$  (BC ship emission is included), which has unintentionally not been included. The dust is emitted from constant sources with their erodibility expressed as a function of surrounding topography (Ginoux et al., 2001). The sea salt emissions are based on Mårtensson et al. (2003) and Monahan et al. (1986) for fine and coarse mode particles, respectively. Aerosols are externally mixed except for black carbon, which is internally mixed with sulphate. The optical properties of the mixture are calculated by volume weighting of their refractive indices using a Mie code. In the present configuration, the model is run with observed sea surface temperatures (SSTs) and sea-ice distribution (Taylor et al., 2000). In addition, the wind components are nudged, with a 6-hour relaxation time, towards the NCEP-NCAR re-analysis provided on a T62 Gaussian grid with 192 longitude equally spaced and 94 latitude unequally spaced grid points (Kalnay et al., 1996). This resolution is lower than in GFDL-AM4, which may create a low bias of aerosol emission depending on surface winds.

## 175 **S4.9 GISS-OMA**

GISS-OMA is the short name of the GISS ModelE Earth system model (Kelley et al., 2020), coupled with the One-Moment Aerosol scheme (OMA, Bauer et al., 2020). In OMA, all aerosols are externally mixed and tracked by their total mass only, except for sea salt and dust where 2 and 5 size-resolved sections are used, respectively. OMA tracks sulphate, nitrate, ammonium, carbonaceous aerosols (black and organic carbon), dust (up to 16  $\mu\text{m}$ ) and sea salt (up to 4  $\mu\text{m}$ ).

180 Relevant to this work, a random maximum cloud overlap is calculated in the column, which is then used to define a totally cloudy or totally cloud-free state in radiation, using a pseudo-random number generation. This is described in Hansen et al. (1983).

For AS AOD calculations RH = 100 % is used, while for CS ambient is used. This applies to the whole atmospheric column, as dictated by the random maximum cloud overlap calculation. As a result, AS diagnostics show unrealistically high values  
185 when compared to observations. Therefore, only the provided CS diagnostics from GISS-OMA fields are presented in this paper.

## **S4.10 INCA**

The INCA (INteraction with Chemistry and Aerosols) and ORCHIDEE land surface modules have been coupled to LMDZ dynamical core to conform the LMDZORINCA model. It has been run with forced sea-surface temperatures, sea-ice concentrations and with nudged monthly wind-fields from ERA-Interim. Comparisons with climatological simulations without  
190 nudged winds show slightly larger emissions in the un-nudged runs of those aerosols driven interactively by wind at the surface (Balkanski et al., 2004; Schulz et al., 2009). The aerosol modelling in INCA relies on a modal approach to represent the size distribution of DU, SS, BC, NO<sub>3</sub>, SO<sub>4</sub>, SO<sub>2</sub> and OA with a combination of accumulation and coarse log-normal modes (both soluble and insoluble). Since these runs use a simplified chemistry scheme, DMS emissions are prescribed and  
195 not interactively calculated, and the secondary organic aerosols are not simulated.

The current version is modelling BC as internally mixed with sulphate (Wang et al., 2016), where the refractive index is estimated using the Maxwell-Garnett method. This results in an increased and more accurate BC absorption. On the other hand, the dust refractive index is deduced from dedicated experiments (Biagio et al., 2017, 2019) showing a marked impact on the longwave part of the spectrum. This results in a less absorbing dust aerosol. BC emissions are derived from inventories and  
200 are equally partitioned between surface and altitude.

## **S4.11 NorESM2**

The atmosphere module in NorESM2 (NorESM2-MM, see Seland et al., 2020), CAM6-Nor (Olivié et al., 2020), is an updated version of CAM5.3-Oslo, for which optical properties have been described and validated by Kirkevåg et al. (2018). The grid latitude / longitude resolution for the atmosphere model is 0.9° x 1.25°, with 32 layers in the vertical and model top at 3.6 hPa.  
205 The aerosol components represented are sulphate, black carbon, primary and secondary OM, sea salt and mineral dust. Processes taken into account include: primary emission; gas- and aqueous-phase chemistry; nucleation; growth by coagulation, condensation (including water uptake) and cloud processing; in-cloud and below-cloud scavenging; dry deposition and gravitational settling. The aerosol module, OsloAero6, makes use of a “production tagged” method (Kirkevåg et al., 2018) to calculate aerosol size and chemical composition. It describes a number of “background” log-normal modes that can change their size  
210 distribution due to condensation, coagulation, and cloud processing. A detailed offline size-resolving model (AeroTab6, see AeroTab user guide, 2020) carries out the corresponding aerosol micro-physical calculations, from which results are stored in lookup tables for use in OsloAero6 (in CAM6-Nor). Hygroscopicity is estimated for each particle size and type by use of the volume mixing rule for internal mixtures, adding water as a function of RH according to Köhler theory.

## **S4.12 OsloCTM3**

215 The OsloCTM3 is a global, offline chemical transport model (CTM) driven by 3-hourly meteorological data from the European Centre for Medium Range Weather Forecast (ECMWF) Integrated Forecast System (IFS) model, and is an updated version of the OsloCTM2 used in previous AeroCom phases (Søvde et al., 2012; Lund et al., 2018). The model is run in a

2.25° x 2.25° horizontal resolution, with 60 vertical levels (the uppermost centered at 0.1 hPa). OsloCTM3 includes the aerosol species sulphate, black carbon, organic aerosols, nitrate, sea salt, dust. The treatment of transport and scavenging, as well as individual aerosol modules, is described in detail in Lund et al. (2018) and references therein. In OsloCTM3, the absorption properties have been updated, with BC mass absorption coefficient (MAC) following formula in Zanatta et al. (2016) and a weak absorption implemented for OA (Lund et al., 2018). Only all-sky (AS) AOD is provided from OsloCTM3. This is done because a reliable sub-grid scale parameterisation for RH is unavailable, in order to avoid the AOD used in the radiative transfer calculations to be biased low or high.

#### 225 **S4.13 SPRINTARS**

SPRINTARS (Takemura et al., 2005, 2009), coupled with an atmosphere-ocean general circulation model, MIROC (Tatebe et al., 2019), is used in this study. SPRINTARS predicts the mass mixing ratios of major tropospheric aerosol components (SO<sub>4</sub>, BC, OA, soil DU, SS, and precursor gases of SO<sub>4</sub>, including SO<sub>2</sub> and dimethyl sulphide (DMS)) by simulating the aerosol transport processes. It also simulates aerosol–radiation and aerosol–cloud interactions by connecting atmospheric radiation and cloud/precipitation processes, respectively, with MIROC. The 6-hourly ECMWF ERA5 data (Hersbach et al., 2020) are used for nudging temperature and horizontal wind. The horizontal resolution is T85 (approximately 1.4° x 1.4° in longitude and latitude), and the vertical resolution of the hybrid sigma-pressure coordinate was 40 layers.

## References

- AeroTab user guide: AeroTab user guide, [https://github.com/NorESMhub/NorESM/blob/noresm2/doc/configurations/AeroTab-user-guide\\_v16april2020.pdf](https://github.com/NorESMhub/NorESM/blob/noresm2/doc/configurations/AeroTab-user-guide_v16april2020.pdf)[https://github.com/NorESMhub/NorESM/blob/noresm2/doc/configurations/AeroTab-user-guide\\_v16april2020.pdf](https://github.com/NorESMhub/NorESM/blob/noresm2/doc/configurations/AeroTab-user-guide_v16april2020.pdf), last access: 2020-08-20, 2020.
- Balkanski, Y., Schulz, M., Claquin, T., Moulin, C., and Ginoux, P.: Global Emissions of Mineral Aerosol: Formulation and Validation using Satellite Imagery, in: *Advances in Global Change Research*, pp. 239–267, Springer Netherlands, [https://doi.org/10.1007/978-1-4020-2167-1\\_6](https://doi.org/10.1007/978-1-4020-2167-1_6), [https://doi.org/10.1007%2F978-1-4020-2167-1\\_6](https://doi.org/10.1007%2F978-1-4020-2167-1_6), 2004.
- Bauer, S. E., Tsigaridis, K., Faluvegi, G., Kelley, M., Lo, K. K., Miller, R. L., Nazarenko, L., Schmidt, G. A., and Wu, J.: Historical (1850–2014) aerosol evolution and role on climate forcing using the GISS ModelE2.1 contribution to CMIP6, *Journal of Advances in Modeling Earth Systems*, 12, e2019MS001978, <https://doi.org/10.1029/2019MS001978>, 2020.
- Bergman, T., Makkonen, R., Schrödner, R., Swietlicki, E., Phillips, V., Le Sager, P., and van Noije, T.: Description and evaluation of a secondary organic aerosol and new particle formation scheme within TM5-MP v1.1, **in preparation**, 2020.
- Biagio, C. D., Formenti, P., Balkanski, Y., Caponi, L., Cazaunau, M., Pangui, E., Journet, E., Nowak, S., Caqueneau, S., Andreae, M. O., Kandler, K., Saeed, T., Piketh, S., Seibert, D., Williams, E., and Doussin, J.-F.: Global scale variability of the mineral dust long-wave refractive index: a new dataset of in situ measurements for climate modeling and remote sensing, *Atmospheric Chemistry and Physics*, 17, 1901–1929, <https://doi.org/10.5194/acp-17-1901-2017>, 2017.
- Biagio, C. D., Formenti, P., Balkanski, Y., Caponi, L., Cazaunau, M., Pangui, E., Journet, E., Nowak, S., Andreae, M. O., Kandler, K., Saeed, T., Piketh, S., Seibert, D., Williams, E., and Doussin, J.-F.: Complex refractive indices and single scattering albedo of global dust aerosols in the shortwave spectrum and relationship to iron content and size, <https://doi.org/10.5194/acp-2019-145>, 2019.
- Bian, H., Chin, M., Hauglustaine, D. A., Schulz, M., Myhre, G., Bauer, S. E., Lund, M. T., Karydis, V. A., Kucsera, T. L., Pan, X., Pozzer, A., Skeie, R. B., Steenrod, S. D., Sudo, K., Tsigaridis, K., Tsimpidi, A. P., and Tsyro, S. G.: Investigation of global particulate nitrate from the AeroCom phase<sup>III</sup> experiment, *Atmospheric Chemistry and Physics*, 17, 12911–12940, <https://doi.org/10.5194/acp-17-12911-2017>, 2017.
- Bian, H., Froyd, K., Murphy, D. M., Dibb, J., Darmenov, A., Chin, M., Colarco, P. R., da Silva, A., Kucsera, T. L., Schill, G., Yu, H., Bui, P., Dollner, M., Weinzierl, B., and Smirnov, A.: Observationally constrained analysis of sea salt aerosol in the marine atmosphere, *Atmospheric Chemistry and Physics*, 19, 10773–10785, <https://doi.org/10.5194/acp-19-10773-2019>, 2019.
- Bond, T. C., Doherty, S. J., Fahey, D. W., Forster, P. M., Berntsen, T., DeAngelo, B. J., Flanner, M. G., Ghan, S., Kärcher, B., Koch, D., Kinne, S., Kondo, Y., Quinn, P. K., Sarofim, M. C., Schultz, M. G., Schulz, M., Venkataraman, C., Zhang, H., Zhang, S., Bellouin, N., Guttikunda, S. K., Hopke, P. K., Jacobson, M. Z., Kaiser, J. W., Klimont, Z., Lohmann, U., Schwarz, J. P., Shindell, D., Storelvmo, T., Warren, S. G., and Zender, C. S.: Bounding the role of black carbon in the climate system: A scientific assessment, *Journal of Geophysical Research: Atmospheres*, 118, 5380–5552, <https://doi.org/10.1002/jgrd.50171>, 2013.
- Cheng, T., Peng, Y., Feichter, J., and Tegen, I.: An improvement on the dust emission scheme in the global aerosol-climate model ECHAM5-HAM, *Atmospheric Chemistry and Physics*, 8, 1105–1117, <https://doi.org/10.5194/acp-8-1105-2008>, 2008.
- Chin, M., Ginoux, P., Kinne, S., Torres, O., Holben, B. N., Duncan, B. N., Martin, R. V., Logan, J. A., Higurashi, A., and Nakajima, T.: Tropospheric Aerosol Optical Thickness from the GOCART Model and Comparisons with Satellite and Sun Photometer Measurements, *Journal of the Atmospheric Sciences*, 59, 461–483, [https://doi.org/10.1175/1520-0469\(2002\)059<0461:TAOTFT>2.0.CO;2](https://doi.org/10.1175/1520-0469(2002)059<0461:TAOTFT>2.0.CO;2), 2002.
- Colarco, P., da Silva, A., Chin, M., and Diehl, T.: Online simulations of global aerosol distributions in the NASA GEOS-4 model and comparisons to satellite and ground-based aerosol optical depth, *Journal of Geophysical Research: Atmospheres*, 115, <https://doi.org/10.1029/2009JD012820>, 2010.
- Dee, D. P., Uppala, S. M., Simmons, A. J., Berrisford, P., Poli, P., Kobayashi, S., Andrae, U., Balmaseda, M. A., Balsamo, G., Bauer, P., Bechtold, P., Beljaars, A. C. M., van de Berg, L., Bidlot, J., Bormann, N., Delsol, C., Dragani, R., Fuentes, M., Geer, A. J., Haimberger, L., Healy, S. B., Hersbach, H., Hólm, E. V., Isaksen, I., Kållberg, P., Köhler, M., Matricardi, M., McNally, A. P., Monge-Sanz, B. M., Morcrette, J.-J., Park, B.-K., Peubey, C., de Rosnay, P., Tavolato, C., Thépaut, J.-N., and Vitart, F.: The ERA-Interim reanalysis: configuration and performance of the data assimilation system, *Quarterly Journal of the Royal Meteorological Society*, 137, 553–597, <https://doi.org/10.1002/qj.828>, 2011.
- Eyring, V., Bony, S., Meehl, G. A., Senior, C. A., Stevens, B., Stouffer, R. J., and Taylor, K. E.: Overview of the Coupled Model Intercomparison Project Phase 6 (CMIP6) experimental design and organization, *Geoscientific Model Development*, 9, 1937–1958, <https://doi.org/10.5194/gmd-9-1937-2016>, 2016.
- Flemming, J., Huijnen, V., Arteta, J., Bechtold, P., Beljaars, A., Blechschmidt, A.-M., Diamantakis, M., Engelen, R. J., Gaudel, A., Inness, A., Jones, L., Josse, B., Katragkou, E., Marecal, V., Peuch, V.-H., Richter, A., Schultz, M. G., Stein, O., and Tsikerdekis, A.: Tropospheric chemistry in the Integrated Forecasting System of ECMWF, *Geoscientific Model Development*, 8, 975–1003, <https://doi.org/10.5194/gmd-8-975-2015>, 2015.

- 285 Gates, W. L., Boyle, J. S., Covey, C., Dease, C. G., Doutriaux, C. M., Drach, R. S., Fiorino, M., Gleckler, P. J., Hnilo, J. J., Marlais, S. M., Phillips, T. J., Potter, G. L., Santer, B. D., Sperber, K. R., Taylor, K. E., and Williams, D. N.: An Overview of the Results of the Atmospheric Model Intercomparison Project (AMIP I), *Bulletin of the American Meteorological Society*, 80, 29–56, [https://doi.org/10.1175/1520-0477\(1999\)080<0029:AOOTRO>2.0.CO;2](https://doi.org/10.1175/1520-0477(1999)080<0029:AOOTRO>2.0.CO;2), 1999.
- 290 Gelaro, R., McCarty, W., Suárez, M. J., Todling, R., Molod, A., Takacs, L., Randles, C. A., Darmenov, A., Bosilovich, M. G., Reichle, R., Wargan, K., Coy, L., Cullather, R., Draper, C., Akella, S., Buchard, V., Conaty, A., da Silva, A. M., Gu, W., Kim, G.-K., Koster, R., Lucchesi, R., Merkova, D., Nielsen, J. E., Partyka, G., Pawson, S., Putman, W., Rienecker, M., Schubert, S. D., Sienkiewicz, M., and Zhao, B.: The Modern-Era Retrospective Analysis for Research and Applications, Version 2 (MERRA-2), *Journal of Climate*, 30, 5419–5454, <https://doi.org/10.1175/JCLI-D-16-0758.1>, 2017.
- 295 Ginoux, P., Chin, M., Tegen, I., Prospero, J. M., Holben, B., Dubovik, O., and Lin, S.-J.: Sources and distributions of dust aerosols simulated with the GOCART model, *Journal of Geophysical Research: Atmospheres*, 106, 20 255–20 273, <https://doi.org/10.1029/2000JD000053>, 2001.
- 300 Gliß, J., Mortier, A., Schulz, M., Andrews, E., Balkanski, Y., Bauer, S. E., Benedictow, A. M. K., Bian, H., Checa-Garcia, R., Chin, M., Ginoux, P., Griesfeller, J. J., Heckel, A., Kipling, Z., Kirkevåg, A., Kokkola, H., Laj, P., Le Sager, P., Lund, M. T., Lund Myhre, C., Matsui, H., Myhre, G., Neubauer, D., van Noije, T., North, P., Olivié, D. J. L., Sogacheva, L., Takemura, T., Tsigaridis, K., and Tsyro, S. G.: Multi-model evaluation of aerosol optical properties in the AeroCom phase III Control experiment, using ground and space based columnar observations from AERONET, MODIS, AATSR and a merged satellite product as well as surface in-situ observations from GAW, *Atmospheric Chemistry and Physics Discussions*, 2020, 1–62, <https://doi.org/10.5194/acp-2019-1214>, 2020.
- Guelle, W., Schulz, M., Balkanski, Y., and Dentener, F.: Influence of the source formulation on modeling the atmospheric global distribution of sea salt aerosol, *Journal of Geophysical Research: Atmospheres*, 106, 27 509–27 524, <https://doi.org/10.1029/2001JD900249>, 2001.
- 305 Hansen, J., Russell, G., Rind, D., Stone, P., Lacis, A., Lebedeff, S., Ruedy, R., and Travis, L.: Efficient three-dimensional global models for climate studies: Models I and II, *Monthly Weather Review*, 111, 609–662, 1983.
- Heinold, B., Tegen, I., Schepanski, K., and Banks, J. R.: New developments in the representation of Saharan dust sources in the aerosol–climate model ECHAM6-HAM2, *Geoscientific Model Development*, 9, 765–777, <https://doi.org/10.5194/gmd-9-765-2016>, 2016.
- 310 Hersbach, H., Bell, B., Berrisford, P., Hirahara, S., Horányi, A., Muñoz-Sabater, J., Nicolas, J., Peubey, C., Radu, R., Schepers, D., Simmons, A., Soci, C., Abdalla, S., Abellan, X., Balsamo, G., Bechtold, P., Biavati, G., Bidlot, J., Bonavita, M., De Chiara, G., Dahlgren, P., Dee, D., Diamantakis, M., Dragani, R., Flemming, J., Forbes, R., Fuentes, M., Geer, A., Haimberger, L., Healy, S., Hogan, R. J., Hólm, E., Janisková, M., Keeley, S., Laloyaux, P., Lopez, P., Lupu, C., Radnoti, G., de Rosnay, P., Rozum, I., Vamborg, F., Villaume, S., and Thépaut, J.-N.: The ERA5 global reanalysis, *Quarterly Journal of the Royal Meteorological Society*, 146, 1999–2049, <https://doi.org/10.1002/qj.3803>, 2020.
- 315 Hess, M., Koepke, P., and Schult, I.: Optical properties of aerosols and clouds: The software package OPAC, *Bulletin of the American meteorological society*, 79, 831–844, 1998.
- Kalnay, E., Kanamitsu, M., Kistler, R., Collins, W., Deaven, D., Gandin, L., Iredell, M., Saha, S., White, G., Woollen, J., and others: The NCEP/NCAR 40-year reanalysis project, *Bulletin of the American Meteorological Society*, 77, 437–472, 1996.
- 320 Kelley, M., Schmidt, G. A., Nazarenko, L. S., Bauer, S. E., Ruedy, R., Russell, G. L., Ackerman, A. S., Aleinov, I., Bauer, M., Bleck, R., Canuto, V., Cesana, G., Cheng, Y., Clune, T. L., Cook, B. I., Cruz, C. A., Del Genio, A. D., Elsaesser, G. S., Faluvegi, G., Kiang, N. Y., Kim, D., Lacis, A. A., Leboissetier, A., LeGrande, A. N., Lo, K. K., Marshall, J., Matthews, E. E., McDermid, S., Mezzuman, K., Miller, R. L., Murray, L. T., Oinas, V., Orbe, C., Pérez García-Pando, C., Perlwitz, J. P., Puma, M. J., Rind, D., Romanou, A., Shindell, D. T., Sun, S., Tausnev, N., Tsigaridis, K., Tselioudis, G., Weng, E., Wu, J., and Yao, M.-S.: GISS-E2.1: Configurations and Climatology, *Journal of Advances in Modeling Earth Systems*, 12, e2019MS002 025, <https://doi.org/10.1029/2019MS002025>, 2020.
- 325 Kirkevåg, A., Grini, A., Olivié, D., Seland, Ø., Alterskjær, K., Hummel, M., Karset, I. H. H., Lewinschal, A., Liu, X., Makkonen, R., Bethke, I., Griesfeller, J., Schulz, M., and Iversen, T.: A production-tagged aerosol module for Earth system models, OsloAero5.3 – extensions and updates for CAM5.3-OSLO, *Geoscientific Model Development*, 11, 3945–3982, <https://doi.org/10.5194/gmd-11-3945-2018>, 2018.
- Kokkola, H., Kühn, T., Laakso, A., Bergman, T., Lehtinen, K. E., Mielonen, T., Arola, A., Stadtler, S., Korhonen, H., Ferrachat, S., Lohmann, U., Neubauer, D., Tegen, I., Siegenthaler-Le Drian, C., Schultz, M. G., Bey, I., Stier, P., Daskalakis, N., Heald, C. L., and Romakkaniemi, S.: SALSA2.0: The sectional aerosol module of the aerosol-chemistry-climate model ECHAM6.3.0-HAM2.3-MOZ1.0, *Geoscientific Model Development*, <https://doi.org/10.5194/gmd-11-3833-2018>, 2018.
- 330 Long, M. S., Keene, W. C., Kieber, D. J., Erickson, D. J., and Maring, H.: A sea-state based source function for size- and composition-resolved marine aerosol production, *Atmospheric Chemistry and Physics*, 11, 1203–1216, <https://doi.org/10.5194/acp-11-1203-2011>, 2011.
- 335 Lund, M. T., Myhre, G., Haslerud, A. S., Skeie, R. B., Griesfeller, J., Platt, S. M., Kumar, R., Myhre, C. L., and Schulz, M.: Concentrations and radiative forcing of anthropogenic aerosols from 1750 to 2014 simulated with the Oslo-CTM3 and CEDS emission inventory, *Geoscientific Model Development*, 11, 4909–4931, <https://doi.org/10.5194/gmd-11-4909-2018>, 2018.

- Mårtensson, E. M., Nilsson, E. D., de Leeuw, G., Cohen, L. H., and Hansson, H.-C.: Laboratory simulations and parameterization of the primary marine aerosol production, *Journal of Geophysical Research: Atmospheres*, 108, <https://doi.org/10.1029/2002JD002263>, 2003.
- Matsui, H.: Development of a global aerosol model using a two-dimensional sectional method: 1. Model design, *Journal of Advances in Modeling Earth Systems*, 9, 1921–1947, <https://doi.org/10.1002/2017MS000936>, 2017.
- Matsui, H. and Mahowald, N.: Development of a global aerosol model using a two-dimensional sectional method: 2. Evaluation and sensitivity simulations, *Journal of Advances in Modeling Earth Systems*, 9, 1887–1920, <https://doi.org/10.1002/2017MS000937>, 2017.
- Monahan, E. C., Spiel, D. E., and Davidson, K. L.: *A Model of Marine Aerosol Generation Via Whitecaps and Wave Disruption BT - Oceanic Whitecaps: And Their Role in Air-Sea Exchange Processes*, pp. 167–174, Springer Netherlands, Dordrecht, [https://doi.org/10.1007/978-94-009-4668-2\\_16](https://doi.org/10.1007/978-94-009-4668-2_16), 1986.
- Morcrette, J.-J., Boucher, O., Jones, L., Salmond, D., Bechtold, P., Beljaars, A., Benedetti, A., Bonet, A., Kaiser, J. W., Razinger, M., Schulz, M., Serrar, S., Simmons, A. J., Sofiev, M., Suttie, M., Tompkins, A. M., and Untch, A.: Aerosol analysis and forecast in the European Centre for Medium-Range Weather Forecasts Integrated Forecast System: Forward modeling, *Journal of Geophysical Research: Atmospheres*, 114, <https://doi.org/10.1029/2008JD011235>, 2009.
- Mortier, A., Gliss, J., and Schulz, M.: AeroCom web visualisation (Satellite evaluation), available at <https://aerocom-evaluation.met.no/overall.php?project=satellite&exp=eval2019>, last access: 23 December 2020, 2020.
- O'Donnell, D., Tsigaridis, K., and Feichter, J.: Estimating the direct and indirect effects of secondary organic aerosols using ECHAM5-HAM, *Atmospheric Chemistry and Physics*, 11, 8635–8659, <https://doi.org/10.5194/acp-11-8635-2011>, 2011.
- Olivié et al.: Evaluation of radiative forcing in the Norwegian Earth System Model NorESM2, **in preparation**, 2020.
- Petters, M. D. and Kreidenweis, S. M.: A single parameter representation of hygroscopic growth and cloud condensation nucleus activity, *Atmospheric Chemistry and Physics*, 7, 1961–1971, <https://doi.org/10.5194/acp-7-1961-2007>, 2007.
- Pincus, R. and Stevens, B.: Paths to accuracy for radiation parameterizations in atmospheric models, *Journal of Advances in Modeling Earth Systems*, 5, 225–233, <https://doi.org/10.1002/jame.20027>, 2013.
- Popp, T., de Leeuw, G., Bingen, C., Brühl, C., Capelle, V., Chedin, A., Clarisse, L., Dubovik, O., Grainger, R., Griesfeller, J., Heckel, A., Kinne, S., Klüser, L., Kosmale, M., Kolmonen, P., Lelli, L., Litvinov, P., Mei, L., North, P., Pinnock, S., Povey, A., Robert, C., Schulz, M., Sogacheva, L., Stebel, K., Stein Zweers, D., Thomas, G., Tilstra, L., Vandenbussche, S., Veefkind, P., Vountas, M., and Xue, Y.: Development, Production and Evaluation of Aerosol Climate Data Records from European Satellite Observations (Aerosol\_cci), *Remote Sensing*, 8, 421, <https://doi.org/10.3390/rs8050421>, 2016.
- Rémy, S., Kipling, Z., Flemming, J., Boucher, O., Nabat, P., Michou, M., Bozzo, A., Ades, M., Huijnen, V., Benedetti, A., Engelen, R., Peuch, V.-H., and Morcrette, J.-J.: Description and evaluation of the tropospheric aerosol scheme in the European Centre for Medium-Range Weather Forecasts (ECMWF) Integrated Forecasting System (IFS-AER, cycle 45R1), *Geoscientific Model Development*, 12, 4627–4659, <https://doi.org/10.5194/gmd-12-4627-2019>, 2019.
- Rienecker, M. M., Suarez, M., Todling, R., Bacmeister, J., Takacs, L., Liu, H., Gu, W., Sienkiewicz, M., Koster, R., Gelaro, R., et al.: The GEOS-5 Data Assimilation System: Documentation of Versions 5.0.1, 5.1.0, and 5.2.0, 2008.
- Schultz, M. G., Stadler, S., Schröder, S., Taraborrelli, D., Franco, B., Krefting, J., Henrot, A., Ferrachat, S., Lohmann, U., Neubauer, D., Siegenthaler-Le Drian, C., Wahl, S., Kokkola, H., Kühn, T., Rast, S., Schmidt, H., Stier, P., Kinnison, D., Tyndall, G. S., Orlando, J. J., and Wespes, C.: The chemistry–climate model ECHAM6.3-HAM2.3-MOZ1.0, *Geoscientific Model Development*, 11, 1695–1723, <https://doi.org/10.5194/gmd-11-1695-2018>, 2018.
- Schulz, M., Cozic, A., and Szopa, S.: LMDzT-INCA dust forecast model developments and associated validation efforts, IOP Conference Series: Earth and Environmental Science, 7, 12 014, <https://doi.org/10.1088/1755-1307/7/1/012014>, 2009.
- Schulz, M., Steensen, B. M., Tsyro, S., and Koffi, B.: First results of comparison modelled aerosol extinction profiles with CALIOP data, in: *Transboundary acidification, eutrophication and ground level ozone in Europe in 2010. EMEP Status Report 1/2012*, pp. 113–121, Norwegian Meteorological Institute, [https://emep.int/publ/reports/2012/status\\_report\\_1\\_2012.pdf](https://emep.int/publ/reports/2012/status_report_1_2012.pdf), 2012.
- Seland, Ø., Bentsen, M., Olivié, D., Toniazzo, T., Gjermundsen, A., Graff, L. S., Debernard, J. B., Gupta, A. K., He, Y.-C., Kirkevåg, A., Schwinger, J., Tjiputra, J., Aas, K. S., Bethke, I., Fan, Y., Griesfeller, J., Grini, A., Guo, C., Ilicak, M., Karset, I. H. H., Landgren, O., Liakka, J., Moseid, K. O., Nummelin, A., Spensberger, C., Tang, H., Zhang, Z., Heinze, C., Iversen, T., and Schulz, M.: Overview of the Norwegian Earth System Model (NorESM2) and key climate response of CMIP6 DECK, historical, and scenario simulations, *Geoscientific Model Development*, 13, 6165–6200, <https://doi.org/10.5194/gmd-13-6165-2020>, 2020.
- Simpson, D., Benedictow, A., Berge, H., Bergström, R., Emberson, L. D., Fagerli, H., Flechard, C. R., Hayman, G. D., Gauss, M., Jonson, J. E., Jenkin, M. E., Nyiri, A., Richter, C., Semeena, V. S., Tsyro, S., Tuovinen, J.-P., Valdebenito, A., and Wind, P.: The EMEP MSC-W chemical transport model – technical description, *Atmospheric Chemistry and Physics*, 12, 7825–7865, <https://doi.org/10.5194/acp-12-7825-2012>, 2012.
- Sofiev, M., Soares, J., Prank, M., de Leeuw, G., and Kukkonen, J.: A regional-to-global model of emission and transport of sea salt particles in the atmosphere, *Journal of Geophysical Research: Atmospheres*, 116, <https://doi.org/10.1029/2010JD014713>, 2011.

- 390 Sogacheva, L., Popp, T., Sayer, A. M., Dubovik, O., Garay, M. J., Heckel, A., Hsu, N. C., Jethva, H., Kahn, R. A., Kolmonen, P., Kosmale, M., de Leeuw, G., Levy, R. C., Litvinov, P., Lyapustin, A., North, P., Torres, O., and Arola, A.: Merging regional and global aerosol optical depth records from major available satellite products, *Atmospheric Chemistry and Physics*, 20, 2031–2056, <https://doi.org/10.5194/acp-20-2031-2020>, 2020.
- Søvde, O. A., Prather, M. J., Isaksen, I. S. A., Berntsen, T. K., Stordal, F., Zhu, X., Holmes, C. D., and Hsu, J.: The chemical transport model Oslo CTM3, *Geoscientific Model Development*, 5, 1441–1469, <https://doi.org/10.5194/gmd-5-1441-2012>, 2012.
- 395 Takemura, T., Nozawa, T., Emori, S., Nakajima, T. Y., and Nakajima, T.: Simulation of climate response to aerosol direct and indirect effects with aerosol transport-radiation model, *Journal of Geophysical Research: Atmospheres*, 110, <https://doi.org/10.1029/2004JD005029>, 2005.
- Takemura, T., Egashira, M., Matsuzawa, K., Ichijo, H., O’ishi, R., and Abe-Ouchi, A.: A simulation of the global distribution and radiative forcing of soil dust aerosols at the Last Glacial Maximum, *Atmospheric Chemistry and Physics*, 9, 3061–3073, <https://doi.org/10.5194/acp-9-3061-2009>, 2009.
- Tatebe, H., Ogura, T., Nitta, T., Komuro, Y., Ogochi, K., Takemura, T., Sudo, K., Sekiguchi, M., Abe, M., Saito, F., Chikira, M., Watanabe, S., Mori, M., Hirota, N., Kawatani, Y., Mochizuki, T., Yoshimura, K., Takata, K., O’ishi, R., Yamazaki, D., Suzuki, T., Kurogi, M., Kataoka, T., Watanabe, M., and Kimoto, M.: Description and basic evaluation of simulated mean state, internal variability, and climate sensitivity in MIROC6, *Geoscientific Model Development*, 12, 2727–2765, <https://doi.org/10.5194/gmd-12-2727-2019>, 2019.
- 405 Taylor, K. E., Williamson, D., and Zwiers, F.: The Sea Surface Temperature and Sea-Ice Concentration Boundary Conditions for AMIP II Simulations, Report No. 60, Tech. rep., LLNL, 2000.
- Tegen, I., Harrison, S. P., Kohfeld, K., Prentice, I. C., Coe, M., and Heimann, M.: Impact of vegetation and preferential source areas on global dust aerosol: Results from a model study, *Journal of Geophysical Research: Atmospheres*, 107, AAC 14–1–AAC 14–27, <https://doi.org/10.1029/2001JD000963>, 2002.
- 410 Tegen, I., Neubauer, D., Ferrachat, S., Siegenthaler-Le Drian, C., Bey, I., Schutgens, N., Stier, P., Watson-Parris, D., Stanelle, T., Schmidt, H., Rast, S., Kokkola, H., Schultz, M., Schroeder, S., Daskalakis, N., Barthel, S., Heinold, B., and Lohmann, U.: The global aerosol–climate model ECHAM6.3–HAM2.3 – Part 1: Aerosol evaluation, *Geoscientific Model Development*, 12, 1643–1677, <https://doi.org/10.5194/gmd-12-1643-2019>, 2019.
- 415 van Noije, T., Bergman, T., Le Sager, P., O’Donnell, D., Makkonen, R., Gonçalves-Ageitos, M., Döschner, R., Fladrich, U., von Hardenberg, J., Keskinen, J.-P., Korhonen, H., Laakso, A., Myriokefalitakis, S., Ollinaho, P., Pérez García-Pando, C., Reerink, T., Schrödner, R., Wyser, K., and Yang, S.: EC-Earth3-AerChem, a global climate model with interactive aerosols and atmospheric chemistry participating in CMIP6, *Geoscientific Model Development Discussions*, 2020, 1–46, <https://doi.org/10.5194/gmd-2020-413>, 2020.
- van Noije, T. P. C., Le Sager, P., Segers, A. J., van Velthoven, P. F. J., Krol, M. C., Hazeleger, W., Williams, A. G., and Chambers, S. D.: Simulation of tropospheric chemistry and aerosols with the climate model EC-Earth, *Geoscientific Model Development*, 7, 2435–2475, <https://doi.org/10.5194/gmd-7-2435-2014>, 2014.
- 420 Vignati, E., Wilson, J., and Stier, P.: M7: An efficient size-resolved aerosol microphysics module for large-scale aerosol transport models, *Journal of Geophysical Research: Atmospheres*, 109, <https://doi.org/10.1029/2003JD004485>, 2004.
- Wang, R., Balkanski, Y., Boucher, O., Ciais, P., Schuster, G. L., Chevallier, F., Samset, B. H., Liu, J., Piao, S., Valari, M., and Tao, S.: Estimation of global black carbon direct radiative forcing and its uncertainty constrained by observations, *Journal of Geophysical Research: Atmospheres*, 121, 5948–5971, <https://doi.org/10.1002/2015jd024326>, 2016.
- 425 Wiedinmyer, C., Akagi, S. K., Yokelson, R. J., Emmons, L. K., Al-Saadi, J. A., Orlando, J. J., and Soja, A. J.: The Fire INventory from NCAR (FINN): a high resolution global model to estimate the emissions from open burning, *Geoscientific Model Development*, 4, 625–641, <https://doi.org/10.5194/gmd-4-625-2011>, 2011.
- 430 Williams, J. E., Boersma, K. F., Le Sager, P., and Verstraeten, W. W.: The high-resolution version of TM5-MP for optimized satellite retrievals: description and validation, *Geoscientific Model Development*, 10, 721–750, <https://doi.org/10.5194/gmd-10-721-2017>, 2017.
- Zanatta, M., Gysel, M., Bukowiecki, N., Müller, T., Weingartner, E., Areskoug, H., Fiebig, M., Yttri, K. E., Mihalopoulos, N., Kouvarakis, G., Beddows, D., Harrison, R. M., Cavalli, F., Putaud, J. P., Spindler, G., Wiedensohler, A., Alastuey, A., Pandolfi, M., Sellegri, K., Swietlicki, E., Jaffrezo, J. L., Baltensperger, U., and Laj, P.: A European aerosol phenomenology-5: Climatology of black carbon optical properties at 9 regional background sites across Europe, *Atmospheric Environment*, 145, 346–364, <https://doi.org/10.1016/j.atmosenv.2016.09.035>, 2016.
- 435 Zhao, M., Golaz, J.-C., Held, I. M., Guo, H., Balaji, V., Benson, R., Chen, J.-H., Chen, X., Donner, L. J., Dunne, J. P., Dunne, K., Durachta, J., Fan, S.-M., Freidenreich, S. M., Garner, S. T., Ginoux, P., Harris, L. M., Horowitz, L. W., Krasting, J. P., Langenhorst, A. R., Liang, Z., Lin, P., Lin, S.-J., Malyshev, S. L., Mason, E., Milly, P. C. D., Ming, Y., Naik, V., Paulot, F., Paynter, D., Philipps, P., Radhakrishnan, A., Ramaswamy, V., Robinson, T., Schwarzkopf, D., Seman, C. J., Shevliakova, E., Shen, Z., Shin, H., Silvers, L. G., Wilson, J. R., Winton, M., Wittenberg, A. T., Wyman, B., and Xiang, B.: The GFDL Global Atmosphere and Land Model AM4.0/LM4.0: 1. Simulation Char-

acteristics With Prescribed SSTs, *Journal of Advances in Modeling Earth Systems*, 10, 691–734, <https://doi.org/10.1002/2017MS001208>, 2018.
